# Supplementary material for: Long-term Variability in Black Carbon Emissions Constrained by Gap-filled Absorption Aerosol Optical Depth and Associated Premature Mortality in China
Source: Copernicus journal article supplement (doi:10.5194/egusphere-2023-2758), 2023-12-14
Supplement: Supplementary file 1 [file egusphere-2023-2758-supplement.pdf]

## SUPPLEMENTARY INFORMATION

### **Long-term Variability in Black Carbon Emissions Constrained by Gap-filled Absorption Aerosol Optical Depth and Associated Premature Mortality in China**

Wenxin Zhao<sup>1</sup>, Yu Zhao<sup>1,2\*</sup>, Yu Zheng<sup>3</sup>, Dong Chen<sup>4</sup>, Jinyuan Xin<sup>5</sup>, Kaitao Li<sup>6</sup>,  
Huizheng Che<sup>3</sup>, Zhengqiang Li<sup>7</sup>, Mingrui Ma<sup>1</sup>, Yun Hang<sup>8</sup>

1 State Key Laboratory of Pollution Control and Resource Reuse, School of Environment, Nanjing University, 163 Xianlin Rd., Nanjing, Jiangsu 210023, China

2 Jiangsu Collaborative Innovation Center of Atmospheric Environment and Equipment Technology (CICAEET), Nanjing University of Information Science and Technology, Jiangsu 210044, China

3 State Key Laboratory of Severe Weather (LASW) & Key Laboratory of Atmospheric Chemistry of CMA (LAC), Chinese Academy of Meteorological Sciences, Beijing 100081, China

4 Jiangsu Provincial Academy of Environmental Science, 176 North Jiangdong Rd., Nanjing, Jiangsu 210036, China

5 LAPC, Institute of Atmospheric Physics, Chinese Academy of Sciences, Beijing 100029, China

6 School of Information, Space Engineering University, Beijing 101416, China

7 State Environmental Protection Key Laboratory of Satellite Remote Sensing, Aerospace Information Research Institute, Chinese Academy of Sciences, Beijing 100101, China

8 Gangarosa Department of Environment Health, Rollins School of Public Health, Emory University, 1518 Clifton Road NE, Atlanta, GA 30322, USA

\*Corresponding author: Yu Zhao

Phone: 86-25-89680650; email: [yuzhao@nju.edu.cn](mailto:yuzhao@nju.edu.cn)

## **Contents of this file**

Number of pages: 66

Number of texts: 4

Number of tables: 13

Number of figures: 10

## Table of Contents

|                                   |            |
|-----------------------------------|------------|
| <b><u>Text sections</u></b> ..... | <b>S5</b>  |
| <u>Text S1</u> .....              | S5         |
| <u>Text S2</u> .....              | S7         |
| <u>Text S3</u> .....              | S8         |
| <u>Text S4</u> .....              | S12        |
| <b><u>Tables</u></b> .....        | <b>S14</b> |
| <u>Table S1</u> .....             | S14        |
| <u>Table S2</u> .....             | S16        |
| <u>Table S3</u> .....             | S19        |
| <u>Table S4</u> .....             | S16        |
| <u>Table S5</u> .....             | S19        |
| <u>Table S6</u> .....             | S32        |
| <u>Table S7</u> .....             | S33        |
| <u>Table S8</u> .....             | S34        |
| <u>Table S9</u> .....             | S36        |
| <u>Table S10</u> .....            | S37        |
| <u>Table S11</u> .....            | S38        |
| <u>Table S12</u> .....            | S40        |
| <u>Table S13</u> .....            | S42        |
| <b><u>Figures</u></b> .....       | <b>S43</b> |
| <u>Figure S1</u> .....            | S43        |
| <u>Figure S2</u> .....            | S44        |
| <u>Figure S3</u> .....            | S45        |
| <u>Figure S4</u> .....            | S46        |
| <u>Figure S5</u> .....            | S47        |
| <u>Figure S6</u> .....            | S48        |
| <u>Figure S7</u> .....            | S49        |
| <u>Figure S8</u> .....            | S50        |

|                                |            |
|--------------------------------|------------|
| <u>Figure S9</u> .....         | S51        |
| <u>Figure S10</u> .....        | S52        |
| <b><u>References</u></b> ..... | <b>S53</b> |

## **Text sections**

### **Text S1 Description of XGBoost model and specific feature selection**

#### **XGBoost model description**

The XGBoost algorithm is an additive model based on hundreds of decision tree models. XGBoost first builds multiple CART (Classification and Regression Trees) models to predict the data set, and then integrates these trees as a new tree model (Liu et al., 2021). The model will continue to iteratively improve, and the new tree model generated in each iteration will fit the residual of the previous tree. As the number of trees increases, the complexity of the ensemble model will gradually increase until it approaches the complexity of the data itself, at which point the training achieves the best results. XGBoost model has been widely used in predicting air pollution abundance and shown to outperform various statistical and machine learning models (Xiao et al., 2018a). Besides, XGBoost requires less training and predicting time than other machine learning techniques, i.e., random forest.

#### **Specific feature selection**

The selection of the specific features was based on the following basis. Firstly, according to various previous studies, meteorology, geography and temporal parameters were commonly taken as features for gap-filling of satellite product (Liang et al., 2020; Ma et al., 2022). To fill OMI AAOD in this study, we chose aerosol optical and meteorological parameters to reflect the optical properties, transport and diffusion of pollutants. Land-use data and elevation are ancillary variables which directly linked to emission sources and the pollution transport conditions. Considering the continuity in space and time, we also added temporal, latitude and longitude parameters to fill the data gap. Secondly, based on the “skimr” and “DataExplorer” packages in R software (version 4.1.2, <https://www.R-project.org/>), we went through the data distribution and examined the multicollinearity for selected features before model training. We deleted highly correlated features according to variance inflation factor (VIF) analysis to prevent the biased estimation and improve model efficiency. Thirdly, we trained multiple models with different combinations of model parameters and specific features, and determined the optimal feature group based on root mean squared prediction error (RMSE) minimization. The model parameters “*max\_depth*” (maximum number of times for regression tree splitting) and “*colsample\_bytree*” (proportion of interpretation features sampled for splitting at each node) provide an opportunity to randomly select

features for additive model training, and they were respectively determined at 6 and 0.4 to train our model. Not all interpretation features participate in the process of node splitting; thus, the possibility of random combination of model features is further improved.

Through above feature selection process, we determined the optimal feature combination and gap-filling model, to achieve best model performance. Changing the feature combination and parameterization of XGBoost may reduce the model performance and efficiency. Finally, to determine the key characteristics, we used the “xgb.importance” faction to assess the importance levels of specific features in three metrics, i.e., Gain is the average gain of splits which use the feature; Cover is the average coverage of splits which use the feature and the coverage is defined as the number of samples affected by the split; and Frequency is the frequency a feature appears in a tree.

## **Text S2 Description of CMAQ model setting and the prior emissions**

The meteorology field input was provided by the Weather Research and Forecasting Model (WRF) version 3.9. We used a grid system at a horizontal resolution of 27×27 km covering the study domain (Supplementary Figure S1) in Lambert projection with two true latitudes of 40°N and 25°N, and the origin of domain was set at 103°E, 37°N. CMAQ V5.1 adopts the Carbon Bond Mechanism (CB05) and AERO5 mechanisms as the gas-phase chemistry and aerosol module, respectively. The lifetime of BC is mainly influenced by wet and dry removal processes in the atmosphere. The CMAQ model assumed that all aerosol particles are internally mixed and the wet removal of aerosol is proportional to wet removal of sulfate (Binkowski and Roselle, 2003). And the CMAQ model has used the dry deposition scheme of Pleim and Ran (2011), which assumed that key processes of aerosol dry deposition including gravitational settling, Brownian diffusion, surface impaction, surface interception, and rebound are functions of particle diameter  $D_p$ . We used a spin-up time of 7 days for each month to reduce the impact of initial condition. Details of modeling setting can be found in our previous works (Yang et al., 2021).

The prior anthropogenic emissions were taken from the Multi-resolution Emission Inventory for China (MEIC, <http://www.meicmodel.org>; last access: 25 May 2022), and the prior open biomass burning emissions were taken from Global Fire Emissions Database version 4.1s (GFED V4.1s, <https://www.geo.vu.nl/~gwerf/GFED/GFED4/>; last access: 25 May 2022). MEIC is a uniform bottom-up emission inventory model that provides detailed estimates of anthropogenic emissions of air pollutants in China for a long time period with regular updates. It includes a series of improved emission models including unit-based emission inventories for power and industrial plants, a high-resolution county-level vehicle emission inventory, and a residential combustion emission inventory based on national-wide survey data. It takes full consideration of variation in activity level and emission factors based on local measurements and policy implementation in China. Those efforts help improving the quality of emission estimation.

### **Text S3 Description of emission inversion sensitivity tests.**

To explore the uncertainty of the inversion system, we conducted four sensitivity tests, which respectively applied AAOD at another longer wavelength of 865 nm (Test 1), separated BC AAOD with different dust light-absorption contributions (Test 2), adjusted MAE according to ground measurements (Test 3), and adjusted simulated BC lifetime (Test 4). The test designs are briefly summarized in Table S4.

#### **Test 1**

Given that AAOD at 483nm is partly contributed by BrC, we conducted a sensitivity test (Test 1) with AAOD at another longer wavelength of 865 nm, at which the light absorption was seldom influenced by BrC.

Available satellite observation of AAOD was limited. Specifically, OMI AAOD was inverted in the ultraviolet-visible (UV) wavelengths (270-500 nm) while POLDER AAOD with wider wavelength range (443-1020 nm) provided poorer spatiotemporal coverage. We extrapolated the XGBoost-predicted OMI AAOD at 483 nm to 865 nm, based on the absorption Angström exponent (AAE) obtained from POLDER. Firstly, we estimated POLDER AAE with Eq. S1:

$$AAE_{\lambda_1-\lambda_2,i,m,n} = -\frac{\ln[AAOD_{POLDER,\lambda_1,i,m,n}/AAOD_{POLDER,\lambda_2,i,m,n}]}{\ln[\lambda_1/\lambda_2]} \quad (S1)$$

where  $AAOD_{POLDER}$  represents POLDER AAOD at different wavelength;  $\lambda_1$  and  $\lambda_2$  represent two wavelengths (here we chose 490 nm and 865 nm);  $i$  represents the number of grids; and  $m$  and  $n$  represent year and month, respectively.

Then we estimated the spatial distribution of POLDER AAE with Kriging interpolation for periods with POLDER observations (2005-2013). For years without POLDER observations, we extrapolated AAE according to its interannual trend within 2005-2013 from linear regression. Thus we obtained AAE dataset with complete spatiotemporal coverage (2000-2020).

Secondly, based on the AAE dataset, we extrapolated the XGBoost predicted OMI AAOD at 483 nm to AAOD at 865 nm with Eq. S2, based on the AAE dataset:

$$AAOD_{OMI,\lambda_2,i,m,n} = AAOD_{OMI,\lambda_1,i,m,n} \times e^{\ln[\lambda_1/\lambda_2] \times AAE_{\lambda_1-\lambda_2,i,m,n}} \quad (S2)$$

where  $AAOD_{OMI}$  represents OMI AAOD at different wavelength.

Considering the negligible light absorption of BrC at 865 nm, we separated the contributions of dust with MERRA-2 fractions, and obtained BC AAOD at 865 nm. Finally, based on the dataset above, we re-estimated the posterior BC emissions at 865 nm with the “top-down” approach, and compared the results with the base case.



## **Test 2**

Besides BrC, retrievals of BC AAOD from the satellite total AAOD observations need to identify the contribution by mineral dust. There are few studies on observing dust AAOD, while great differences exist in simulated dust AAOD between atmospheric transport models.

In the base case, we adopted the BC contribution to total AAOD from MERRA-2 which considered the effects of dust and light-absorption organic carbon. MERRA-2 adopted wind-driven dust emissions and updated dust optical properties (Meng et al., 2010), and presented great agreement between MERRA-2 and OMI AAOD in dusty regions (Buchard et al., 2017). For mainland China, the multiyear average fraction of dust AAOD to AAOD was 29% during 2000-2020 (Figure S3a). The highest dust fraction mainly appeared in western sand-generating provinces, i.e., Xinjiang, Qinghai, Gansu and Inner Mongolia, and the average multiyear fraction of those provinces reaches 52%.

However, some studies suggested that MERRA-2 may overestimate the dust light-absorption contribution due to excessive local dust emissions and transport of Asian dust (Bakatsoula et al., 2023). To evaluate the uncertainty caused by adopting the dust AAOD fraction from one single model, we conducted a sensitivity Test 2, based on the dust AAOD fraction from another atmospheric composition reanalysis dataset produced by the Copernicus Atmosphere Monitoring Service (CAMS, <https://ads.atmosphere.copernicus.eu/cdsapp#!/search?type=dataset>; last accessed on 8 October 2023). The multiyear average fraction of dust AAOD to AAOD was 14% for CAMS during 2003-2017 (Figure S3b), much lower than that of MERRA-2. To avoid the influence from BrC, we adopted AAOD at the wavelength of 865 nm obtained in Test 1. We re-estimated the posterior BC emissions in 2000, 2010 and 2020 (2005 and 2015 were not involved to save computational resources and time).

## **Test 3**

Given the limited ability of spatial extrapolation of the empirical BC light-absorption model, we conducted a sensitivity test (Test 3) with adjusted MAE based on available measurements (listed in Table S5).

Firstly, we compared the simulated MAE with available measurements from publicly published studies. The average MAE simulated with the posterior emissions is

10.23 m<sup>2</sup>/g (converted to values at 483nm, the same below), much higher than the value of freshly emitted BC (8.48 m<sup>2</sup>/g, Bond et al., 2013). The simulated MAE is smaller than corresponding measurements with an NMB of -19%. As a comparison, the average of MAE from multi-model simulations at the global scale was 27% smaller than the representative measurements (Gliß et al., 2021). CTMs adopted different representation for mixing of BC aerosols resulting in diverse estimates of MAE (Chen et al., 2017b). Considering spatiotemporal representation, as shown in Supplementary Table S6, the measured and simulated MAE present similar seasonal (higher in autumn and winter) and regional patterns (higher in SCB, YRD and PRD). Besides, the simulated MAE presented smaller regional heterogeneity than existing observations, attributed probably to the limited ability of spatial extrapolation of this empirical model. MAE in the key regions (with NMB ranging -22%~-15%) was more underestimated than that in other regions (with NMB of -11%) compared with observations.

Secondly, to explore the influence of MAE uncertainty on BC emission estimation, we adjusted the simulated MAE by region and season, based on the differences between the simulations and observations as shown in Table S6. With the adjusted MAE, we re-estimated the posterior BC emissions with the “top-down” approach and compared the results with the base case.

#### **Test 4**

BC is a well-acknowledged short-lived atmospheric species with an atmospheric lifetime of days to weeks. The chemical transport model reproduces atmospheric processes with simplified algorithm, leading to uncertainties on the simulation of BC lifetime and thereby on the estimation of its atmospheric column concentration and emission inversion.

To evaluate this uncertainty, we firstly calculated the lifetime as the ratio of BC column mass concentration to total BC deposition rates (Gliß et al., 2021). The annual average BC lifetime for mainland China was calculated at 4.7 days in the base case (Figure S4), within the simulated range of 3.8~11.4 days reported by previous studies (Bond et al., 2013), but smaller than the 14 models average of 5.5 days described in Gliß et al. (2021). We then added a sensitivity Test 4, in which the BC lifetime in CMAQ was adjusted to 5.5 days (the multi-model average level) by changing the wet and dry

removal rates of BC. The posterior BC emissions were then re-estimated for 2000, 2010 and 2020 (2005 and 2015 were not involved to save computational resources and time).

### Text S4 Decomposing the contributions of emission and meteorological factors to the mortality due to BC exposure

To separate the contributions of emission and meteorological factors to the mortality due to BC exposure over the four 5-year intervals (2000-2005, 2005-2010, 2010-2015 and 2015-2020), we designed scenarios with fixed emission (*FE*) and meteorological conditions (*FM*) in CMAQ modeling, respectively (Supplementary Table S7). The posterior BC emissions in *FE* and the meteorological conditions in *FM* were fixed at the level of the first year of each interval. During interval *t0-t1*, the contribution of meteorological variation was estimated as the difference between simulated BC concentrations from *FE* in year *t1* and *BASE* in year *t0* (Eq. S3), and the contribution of emission variation as the difference between simulated BC concentrations from *FE* and *BASE* in year *t1* (Eq. S4). To avoid the uncertainty introduced by non-linear relationship between air pollutant concentration and meteorology, we further estimated the contribution of meteorological and emission variation with *FM* (Eqs. S5-S6). The non-linear effect obtained from various scenarios led to a 0.001-0.08  $\mu\text{g}/\text{m}^3$  difference in the simulated BC concentration induced by meteorological variation, which was minor and of limited influence on the conclusions. We then calculated the average contributions of meteorological and emission variations from *FE* and *FM* during the interval (Eq. S7-S8). Relevant equations are as below:

$$\Delta C_{C_{MET,FE}} = C_{FE,t1} - C_{BASE,t0} \quad (\text{S3})$$

$$\Delta C_{C_{EMI,FE}} = C_{BASE,t1} - C_{FE,t1} \quad (\text{S4})$$

$$\Delta C_{C_{MET,FM}} = C_{BASE,t1} - C_{FM,t0} \quad (\text{S5})$$

$$\Delta C_{C_{EMI,FM}} = C_{FM,t0} - C_{BASE,t0} \quad (\text{S6})$$

$$\Delta C_{C_{MET}} = \frac{1}{2}(\Delta C_{C_{MET,FE}} + \Delta C_{C_{MET,FM}}) \quad (\text{S7})$$

$$\Delta C_{C_{EMI}} = \frac{1}{2}(\Delta C_{C_{EMI,FE}} + \Delta C_{C_{EMI,FM}}) \quad (\text{S8})$$

where *MET* and *EMI* represent two exposure factors (*fe*), i.e., meteorology and emission variation;  $\Delta C_{C_{MET,FE}}$  represents changes in BC concentration during the 5-year interval (*t0-t1*) induced by meteorological variation from *FE*;  $\Delta C_{C_{EMI,FE}}$  represents changes in BC concentration during the interval induced by emission variation from *FE*;  $\Delta C_{C_{MET,FM}}$  represents changes in BC concentration during the interval induced by meteorological variation from *FM*;  $\Delta C_{C_{EMI,FM}}$  represents changes in BC concentration during the interval induced by emission variation from *FM*;  $C_{FE,t1}$ ,  $C_{FM,t0}$ ,  $C_{BASE,t0}$  and

$C_{BASE,tl}$  represent simulated BC concentrations from  $FE$ ,  $FM$  and  $BASE$  for year  $tl$  and  $t0$ , respectively;  $\Delta C_{C_{MET}}$  represents changes in BC concentration during the 5-year interval ( $t0-tl$ ) induced by meteorological variation;  $\Delta C_{C_{EMI}}$  represents changes in BC concentration during the interval ( $t0-tl$ ) induced by emission variation.

Based on a direct proportion approach (Geng et al., 2021), we estimated the contributions of emission and meteorological factors to mortality changes attributed to BC exposure ( $\Delta ME$ , Eq. S9-S10). Finally, the total changes in mortality ( $\Delta M$ ) can be attributed to five driving factors (Eq. S11):

$$\frac{\Delta C_{fe}}{\Delta C} = \frac{\Delta C_{C_{fe}}}{\sum_{fe=1}^2 \Delta C_{C_{fe}}}, fe = MET, EMI \quad (S9)$$

$$\Delta ME = \sum_{fe=1}^2 \Delta M_{fe} = \sum_{fe=1}^2 \Delta ME \times \frac{\Delta C_{fe}}{\Delta C} \quad (S10)$$

$$\Delta M = \sum_{fe=1}^2 \Delta M_{fe} + \sum_{fv=1}^3 \Delta M_{fv}, fv = P, PS, B \quad (S11)$$

where  $\Delta C_{fe}$  represents estimated effect of exposure factor  $fe$  (i.e.,  $MET$  or  $EMI$ ) on BC concentration change in a given period;  $\Delta C$  represents the simulated BC concentration changes in a given period;  $\Delta ME$  represents the total effect of two exposure factors on the change in premature mortality attributable to BC; and  $\Delta M$  represents the total change in premature mortality attributable to BC in a given 5-year interval, which is decomposed into two exposure factors ( $fe$ , i.e.,  $MET$  or  $EMI$ ) and three vulnerability factors ( $fv$ , i.e.,  $P, PS, B$ );  $P$  is the population, and change in  $P$  reflects the population change;  $PS$  is the national proportion of the population subgroup, and change in  $PS$  reflects the population aging; and  $B$  is the national baseline mortality rate of all-cause diseases, and change in  $B$  reflects the improved health care.

## Tables

**Table S1 Interpretation variables used in XGBoost model and their importance levels in three metrics. Gain is the average gain of splits which use the feature; Cover is the average coverage of splits which use the feature and the coverage is defined as the number of samples affected by the split; and Frequency is the frequency a feature appears in a tree.**

| ID | Classification | Abbreviation | Full Name                        | Units                              | Gain  | Cover | Frequency |
|----|----------------|--------------|----------------------------------|------------------------------------|-------|-------|-----------|
| 1  | Optical        | AAOD MERRA-2 | Aerosol Absorption Optical Depth | 1                                  | 0.225 | 0.059 | 0.065     |
| 2  | Meteorology    | PS           | Surface pressure                 | Pa                                 | 0.043 | 0.061 | 0.053     |
| 3  | Meteorology    | SWGDN        | Surface incoming shortwave flux  | W m <sup>-2</sup>                  | 0.037 | 0.063 | 0.056     |
| 4  | Meteorology    | EVAP         | Evaporation from turbulence      | kg m <sup>-2</sup> s <sup>-1</sup> | 0.037 | 0.064 | 0.057     |
| 5  | Meteorology    | T2M          | 2-meter max air temperature      | K                                  | 0.033 | 0.056 | 0.054     |
| 6  | Meteorology    | CLDTOT       | Total cloud area fraction        | 1                                  | 0.029 | 0.062 | 0.060     |
| 7  | Meteorology    | SLP          | Sea level pressure               | Pa                                 | 0.029 | 0.057 | 0.059     |
| 8  | Meteorology    | PBLH         | Planetary boundary layer height  | m                                  | 0.026 | 0.059 | 0.054     |
| 9  | Meteorology    | U10M         | 10-meter eastward wind           | m s <sup>-1</sup>                  | 0.024 | 0.062 | 0.058     |
| 10 | Meteorology    | RH           | Relative humidity after moist    | 1                                  | 0.024 | 0.060 | 0.054     |
| 11 | Meteorology    | V10M         | 10-meter northward wind          | m s <sup>-1</sup>                  | 0.022 | 0.059 | 0.056     |
| 12 | Meteorology    | PRECTOT      | Total precipitation              | kg m <sup>-2</sup> s <sup>-1</sup> | 0.019 | 0.059 | 0.055     |
| 13 | Meteorology    | OMEGA        | Vertical pressure velocity       | Pa s <sup>-1</sup>                 | 0.016 | 0.068 | 0.055     |
| 14 | Geography      | LON          | Longitude                        | °                                  | 0.110 | 0.025 | 0.037     |
| 15 | Geography      | LAT          | Latitude                         | °                                  | 0.090 | 0.022 | 0.033     |
| 16 | Geography      | CROP         | Area fraction of crop            | 1                                  | 0.078 | 0.020 | 0.023     |
| 17 | Geography      | DEM          | Elevation                        | m                                  | 0.027 | 0.033 | 0.033     |

**Continued Table S1**

| ID | Classification | Abbreviation | Full Name                 | Units | Gain  | Cover | Frequency |
|----|----------------|--------------|---------------------------|-------|-------|-------|-----------|
| 18 | Geography      | FOREST       | Area fraction of forest   | 1     | 0.015 | 0.025 | 0.024     |
| 19 | Geography      | GRASS        | Area fraction of grass    | 1     | 0.011 | 0.030 | 0.029     |
| 20 | Geography      | SUBURBAN     | Area fraction of suburban | 1     | 0.005 | 0.015 | 0.017     |
| 21 | Geography      | WATER        | Area fraction of water    | 1     | 0.004 | 0.016 | 0.017     |
| 22 | Geography      | URBAN        | Area fraction of urban    | 1     | 0.001 | 0.008 | 0.007     |
| 23 | Temporal       | MONTH        | Month                     | 1     | 0.080 | 0.007 | 0.015     |
| 24 | Temporal       | YEAR         | Year                      | 1     | 0.017 | 0.011 | 0.028     |

**Table S2 Explanation of variables and parameters in equations in this study.**

| Variables/parameters             | Explanation                                                                                                                                              | Appearance                                                            |
|----------------------------------|----------------------------------------------------------------------------------------------------------------------------------------------------------|-----------------------------------------------------------------------|
| $i$                              | the number of grids                                                                                                                                      | Eq. 1, Eq. 2, Eq. 3, Eq. 4,<br>Eq. 5, Eq. 6, Eq. 7, Eq. S1,<br>Eq. S2 |
| $j$                              | the number of vertical layers                                                                                                                            | Eq. 2                                                                 |
| $m$                              | year                                                                                                                                                     | Eq. 1, Eq. 2, Eq. 3, Eq. 4,<br>Eq. 5, Eq. 6, Eq. 7, Eq. S1,<br>Eq. S2 |
| $n$                              | month                                                                                                                                                    | Eq. 1, Eq. 2, Eq. 3, Eq. 4,<br>Eq. 5, Eq. S1, Eq. S2                  |
| $MAE$                            | simulated BC MAE                                                                                                                                         | Eq. 1, Eq. 2                                                          |
| $[NA-PM]$                        | simulated concentration of total<br>non-absorbing matter (i.e., $SO_4^{2-}$ ,<br>$NO_3^-$ and OC)                                                        | Eq. 1                                                                 |
| $[BC]$                           | simulated BC concentration                                                                                                                               | Eq. 1, Eq. 2                                                          |
| $AAOD_{sim}$                     | simulated BC AAOD                                                                                                                                        | Eq. 2, Eq. 4, Eq. 5                                                   |
| $z$                              | simulated top of atmosphere                                                                                                                              | Eq. 2                                                                 |
| $z0$                             | simulated bottom of atmosphere                                                                                                                           | Eq. 2                                                                 |
| $dz$                             | height of the vertical layer                                                                                                                             | Eq. 2                                                                 |
| $AAOD_{BC\_xgb}$                 | separated XGBoost BC AAOD                                                                                                                                | Eq. 3, Eq. 4                                                          |
| $AAOD_{xgb}$                     | XGBoost AAOD                                                                                                                                             | Eq. 3                                                                 |
| $AAOD_{BC\_merra2}$              | MERRA-2 BC AAOD                                                                                                                                          | Eq. 3                                                                 |
| $AAOD_{merra2}$                  | MERRA-2 AAOD                                                                                                                                             | Eq. 3                                                                 |
| $E_{posterior}$                  | the posterior BC emissions                                                                                                                               | Eq. 4                                                                 |
| $E_{prior}$                      | the prior BC emissions                                                                                                                                   | Eq. 4                                                                 |
| $\alpha$                         | a unitless factor representing the<br>sensitivity of changes in BC AAOD<br>to changes in BC emissions in each<br>model grid                              | Eq. 4, Eq. 5                                                          |
| $\Delta E_{perturbed}/E_{prior}$ | 10% reduction of the prior BC<br>emissions                                                                                                               | Eq. 5                                                                 |
| $AAOD_{sim_{perturbed}}$         | simulated BC AAOD with the<br>perturbation                                                                                                               | Eq. 5                                                                 |
| $\Delta C_{i,m}$                 | the difference between the posterior<br>simulated average BC concentration<br>of four months in year $m$ of grid $i$<br>and the health impact thresholds | Eq. 6                                                                 |



**Continued Table S2**

| Variables/parameters    | Explanation                                                                                                      | Appearance             |
|-------------------------|------------------------------------------------------------------------------------------------------------------|------------------------|
|                         | the concentration-response                                                                                       |                        |
| $\beta_{BC}$            | coefficient, 0.0204 (95% confidence interval (CI): 0.0187-0.0224)                                                | Eq. 6                  |
| $AF$                    | attributable fraction of premature mortality to BC exposure                                                      | Eq. 6, Eq. 7           |
| $P$                     | population                                                                                                       | Eq. 7                  |
| $PS$                    | national proportion of the population subgroup                                                                   | Eq. 7                  |
| $B$                     | the national baseline mortality rate of all-cause diseases                                                       | Eq. 7                  |
| $s$                     | population subgroup                                                                                              | Eq. 7                  |
| $AAE$                   | the absorption Angström exponent obtained from POLDER                                                            | Eq. S1, Eq. S2         |
| $AAOD_{POLDER}$         | POLDER AAOD at different wavelength                                                                              | Eq. S1                 |
| $\lambda_1$             | wavelength of 490 nm                                                                                             | Eq. S1, Eq. S2         |
| $\lambda_2$             | wavelength of 865 nm                                                                                             | Eq. S1, Eq. S2         |
| $AAOD_{OMI}$            | OMI AAOD at different wavelength                                                                                 | Eq. S2                 |
| $MET$                   | exposure factor meteorology                                                                                      | Eq. S3, Eq. S5, Eq. S7 |
| $EMI$                   | exposure factor emission                                                                                         | Eq. S4, Eq. S6, Eq. S8 |
| $FE$                    | scenarios with fixed emission                                                                                    | Eq. S3, Eq. S4         |
| $FM$                    | scenarios with fixed meteorological conditions                                                                   | Eq. S5, Eq. S6         |
| $t0$                    | the first year of a five-year interval                                                                           | Eq. S3, Eq. S5, Eq. S6 |
| $t1$                    | the last year of a five-year interval                                                                            | Eq. S3, Eq. S4, Eq. S5 |
| $\Delta C_{C_{MET,FE}}$ | changes in BC concentration during the 5-year interval ( $t0-t1$ ) induced by meteorological variation from $FE$ | Eq. S3, Eq. S7         |
| $\Delta C_{C_{EMI,FE}}$ | changes in BC concentration during the interval induced by emission variation from $FE$                          | Eq. S4, Eq. S8         |
| $\Delta C_{C_{MET,FM}}$ | changes in BC concentration during the interval induced by meteorological variation from $FM$                    | Eq. S5, Eq. S7         |

**Continued Table S2**

| Variables/parameters | Explanation                                                                                                                  | Appearance               |
|----------------------|------------------------------------------------------------------------------------------------------------------------------|--------------------------|
| $\Delta C_{CEMI,FM}$ | changes in BC concentration during the interval induced by emission variation from scenario with <i>FM</i>                   | Eq. S6, Eq. S8           |
| $C_{FE,tI}$          | simulated BC concentrations from <i>FE</i> for year <i>tI</i>                                                                | Eq. S3, Eq. S4           |
| $C_{FM,t0}$          | simulated BC concentrations from <i>FM</i> for year <i>t0</i>                                                                | Eq. S5, Eq. S6           |
| $C_{BASE,t0}$        | simulated BC concentrations from <i>BASE</i> for year <i>t0</i>                                                              | Eq. S3, Eq. S6           |
| $C_{BASE,tI}$        | simulated BC concentrations from <i>BASE</i> for year <i>tI</i>                                                              | Eq. S4, Eq. S5           |
| $\Delta C_{CMET}$    | changes in BC concentration during the 5-year interval ( <i>t0-tI</i> ) induced by meteorological variation                  | Eq. S7                   |
| $\Delta C_{CEMI}$    | changes in BC concentration during the interval ( <i>t0-tI</i> ) induced by emission variation                               | Eq. S8                   |
| $\Delta C_{fe}$      | estimated effect of exposure factor <i>fe</i> (i.e., <i>MET</i> or <i>EMI</i> ) on BC concentration change in a given period | Eq. S9, Eq. S10          |
| $\Delta C$           | the simulated BC concentration changes in a given period                                                                     | Eq. S9, Eq. S10          |
| <i>fe</i>            | two exposure factor, i.e., <i>MET</i> or <i>EMI</i>                                                                          | Eq. S9, Eq. S10, Eq. S11 |
| $\Delta ME$          | the total effect of two exposure factors on the change in premature mortality attributable to BC                             | Eq. S10                  |
| $\Delta M$           | the total change in premature mortality attributable to BC in a given 5-year interval                                        | Eq. S11                  |
| <i>fv</i>            | three vulnerability factors, i.e., <i>P</i> , <i>PS</i> , <i>B</i>                                                           | Eq. S11                  |

**Table S3 Measured BC concentrations collected from publications (unit:  $\mu\text{g}/\text{m}^3$ ).**

| Region | Location | Period    | Season | BC   | References           |
|--------|----------|-----------|--------|------|----------------------|
| BTH    |          | 1999-2000 | annual | 9.4  | He et al. (2001)     |
| BTH    |          | 2001-2002 | annual | 9.9  | Duan et al. (2006)   |
| BTH    |          | 1999-2000 | spring | 6.7  | He et al. (2001)     |
| BTH    |          | 2001      | spring | 6.5  | Yang et al. (2005a)  |
| BTH    |          | 2000      | summer | 3.1  | Song et al. (2006)   |
| BTH    |          | 1999-2000 | autumn | 10.2 | He et al. (2001)     |
| BTH    |          | 2001      | autumn | 10.4 | Duan et al. (2006)   |
| BTH    |          | 2001      | autumn | 10.7 | Yang et al. (2005a)  |
| BTH    |          | 1999-2000 | winter | 11.1 | He et al. (2001)     |
| BTH    |          | 2001      | winter | 11.3 | Duan et al. (2006)   |
| BTH    |          | 2001      | winter | 9.9  | Yang et al. (2005a)  |
| BTH    |          | 2005-2006 | annual | 8.2  | Yang et al. (2011)   |
| BTH    | Beijing  | 2005      | summer | 4.9  | Pathak et al. (2011) |
| BTH    |          | 2004      | winter | 8.3  | Song et al. (2007)   |
| BTH    |          | 2009-2010 | annual | 6.3  | Zhao et al. (2013)   |
| BTH    |          | 2009-2010 | annual | 5.0  | Zhang et al. (2013)  |
| BTH    |          | 2009-2010 | annual | 5.9  | Liu et al. (2014)    |
| BTH    |          | 2009-2010 | annual | 5.0  | Zhang et al. (2013)  |
| BTH    |          | 2009-2010 | spring | 5.2  | Zhao et al. (2013)   |
| BTH    |          | 2009-2010 | summer | 5.9  | Zhao et al. (2013)   |
| BTH    |          | 2009-2010 | summer | 4.2  | Zhang et al. (2013)  |
| BTH    |          | 2009-2010 | autumn | 7.1  | Zhao et al. (2013)   |
| BTH    |          | 2009-2010 | autumn | 5.3  | Zhang et al. (2013)  |
| BTH    |          | 2009-2010 | winter | 7.1  | Zhao et al. (2013)   |
| BTH    |          | 2009-2010 | winter | 7.5  | Zhang et al. (2013)  |
| BTH    |          | 2006-2007 | winter | 8.0  | Li et al. (2009)     |
| BTH    |          | 2009-2010 | annual | 6.9  | Zhao et al. (2013)   |
| BTH    |          | 2008-2009 | annual | 5.7  | Gu et al. (2010)     |
| BTH    | Tianjin  | 2009-2010 | spring | 5.5  | Zhao et al. (2013)   |
| BTH    |          | 2009-2010 | summer | 5.9  | Zhao et al. (2013)   |
| BTH    |          | 2011      | summer | 4.9  | Wei et al. (2012)    |
| BTH    |          | 2009-2010 | autumn | 8.8  | Zhao et al. (2013)   |
| BTH    |          | 2009-2010 | winter | 7.0  | Zhao et al. (2013)   |

**Continued Table S3**

| Region | Location     | Period    | Season | BC   | References                                       |
|--------|--------------|-----------|--------|------|--------------------------------------------------|
| BTH    |              | 2009-2010 | annual | 7.3  | Zhao et al. (2013)                               |
| BTH    |              | 2009-2010 | spring | 4.7  | Zhao et al. (2013)                               |
| BTH    | Chengde      | 2009-2010 | summer | 4.5  | Zhao et al. (2013)                               |
| BTH    |              | 2009-2010 | autumn | 7.2  | Zhao et al. (2013)                               |
| BTH    |              | 2009-2010 | winter | 13.1 | Zhao et al. (2013)                               |
| BTH    | Gucheng      | 2006      | annual | 12.0 | Zhang et al. (2008)                              |
| BTH    |              | 2005      | annual | 2.5  | Zhang et al. (2008)                              |
| BTH    |              | 2009-2010 | annual | 3.9  | Zhao et al. (2013)                               |
| BTH    | Shangdianzi  | 2009-2010 | spring | 3.8  | Zhao et al. (2013)                               |
| BTH    |              | 2009-2010 | summer | 3.3  | Zhao et al. (2013)                               |
| BTH    |              | 2009-2010 | autumn | 3.9  | Zhao et al. (2013)                               |
| BTH    |              | 2009-2010 | winter | 4.4  | Zhao et al. (2013)                               |
| BTH    |              | 2009-2010 | annual | 9.7  | Zhao et al. (2013)                               |
| BTH    |              | 2009-2010 | spring | 7.8  | Zhao et al. (2013)                               |
| BTH    | Shijiazhuang | 2009-2010 | summer | 7.6  | Zhao et al. (2013)                               |
| BTH    |              | 2009-2010 | autumn | 11.4 | Zhao et al. (2013)                               |
| BTH    |              | 2009-2010 | winter | 12.1 | Zhao et al. (2013)                               |
| YRD    |              | 1999-2000 | annual | 6.5  | Ye et al. (2003)                                 |
| YRD    |              | 1999-2000 | spring | 5.3  | Ye et al. (2003)                                 |
| YRD    |              | 1999-2000 | summer | 5.2  | Ye et al. (2003)                                 |
| YRD    |              | 1999-2000 | autumn | 6.9  | Ye et al. (2003)                                 |
| YRD    |              | 1999-2000 | winter | 8.1  | Ye et al. (2003)                                 |
| YRD    |              | 2005-2006 | annual | 2.9  | Feng et al. (2009)                               |
| YRD    |              | 2005-2006 | spring | 3.2  | Feng et al. (2009)                               |
| YRD    |              | 2005-2006 | summer | 2.3  | Feng et al. (2009)                               |
| YRD    |              | 2005-2006 | autumn | 3.9  | Feng et al. (2009)                               |
| YRD    | Shanghai     | 2005-2006 | winter | 2.3  | Feng et al. (2009)                               |
| YRD    |              | 2009      | annual | 4.1  | Zhao et al. (2015b)                              |
| YRD    |              | 2011-2012 | spring | 1.7  | Zhao et al. (2015a)                              |
| YRD    |              | 2011-2012 | summer | 1.4  | Zhao et al. (2015a)                              |
| YRD    |              | 2011-2012 | autumn | 2.4  | Zhao et al. (2015a)                              |
| YRD    |              | 2011-2012 | winter | 2.4  | Zhao et al. (2015a)                              |
| YRD    |              | 2015      | spring | 1.87 | Shanghai Academy<br>of Environmental<br>Sciences |
| YRD    |              | 2015      | summer | 1.61 | (Unpublished data<br>from Cheng Huang)           |
| YRD    |              | 2015      | autumn | 1.77 |                                                  |
| YRD    |              | 2015      | winter | 2.49 |                                                  |

**Continued Table S3**

| Region | Location            | Period         | Season | BC     | References          |                  |
|--------|---------------------|----------------|--------|--------|---------------------|------------------|
| YRD    | Nanjing             | 2001           | autumn | 4.0    | Yang et al. (2005b) |                  |
| YRD    |                     | 2001           | winter | 3.1    | Yang et al. (2005b) |                  |
| YRD    |                     | 2011           | spring | 3.1    | Shen et al. (2014)  |                  |
| YRD    |                     | 2011           | summer | 2.6    | Shen et al. (2014)  |                  |
| YRD    |                     | 2011-2014      | annual | 5.3    | Li et al. (2015)    |                  |
| YRD    |                     | 2011-2014      | spring | 3.8    | Li et al. (2015)    |                  |
| YRD    |                     | 2011-2014      | summer | 3.1    | Li et al. (2015)    |                  |
| YRD    |                     | 2011-2014      | autumn | 5.9    | Li et al. (2015)    |                  |
| YRD    |                     | 2011-2014      | winter | 8.2    | Li et al. (2015)    |                  |
| YRD    |                     | 2015           | spring | 1.86   | Xiao et al. (2018b) |                  |
| YRD    |                     | 2015           | summer | 2.26   | Xiao et al. (2018b) |                  |
| YRD    |                     | 2015           | autumn | 2.54   | Xiao et al. (2018b) |                  |
| YRD    |                     | 2015           | winter | 3.47   | Xiao et al. (2018b) |                  |
| YRD    |                     | 2020           | summer | 2.98   | Tan et al. (2022)   |                  |
| YRD    |                     | 2020           | autumn | 1.71   | Tan et al. (2022)   |                  |
| YRD    |                     | 2020           | winter | 6.98   | Tan et al. (2022)   |                  |
| YRD    |                     | Hangzhou-urban | 2015   | spring | 2.35                | Xu et al. (2019) |
| YRD    |                     |                | 2015   | summer | 1.12                | Xu et al. (2019) |
| YRD    | 2015                |                | autumn | 2.66   | Xu et al. (2019)    |                  |
| YRD    | 2015                |                | winter | 4.68   | Xu et al. (2019)    |                  |
| YRD    | Hangzhou-urban      | 2015           | spring | 4.14   | Xu et al. (2019)    |                  |
| YRD    |                     | 2015           | summer | 3.41   | Xu et al. (2019)    |                  |
| YRD    |                     | 2015           | autumn | 3.09   | Xu et al. (2019)    |                  |
| YRD    |                     | 2015           | winter | 7.89   | Xu et al. (2019)    |                  |
| YRD    | Hangzhou-suburban   | 2015           | spring | 1.79   | Xu et al. (2019)    |                  |
| YRD    |                     | 2015           | summer | 1.20   | Xu et al. (2019)    |                  |
| YRD    |                     | 2015           | autumn | 2.01   | Xu et al. (2019)    |                  |
| YRD    |                     | 2015           | winter | 4.96   | Xu et al. (2019)    |                  |
| YRD    | Hangzhou-background | 2015           | spring | 2.31   | Xu et al. (2019)    |                  |
| YRD    |                     | 2015           | summer | 2.13   | Xu et al. (2019)    |                  |
| YRD    |                     | 2015           | autumn | 2.58   | Xu et al. (2019)    |                  |
| YRD    |                     | 2015           | winter | 4.30   | Xu et al. (2019)    |                  |
| YRD    | Changzhou           | 2015           | summer | 4.10   | Ye et al. (2017)    |                  |
| YRD    |                     | 2015           | autumn | 9.62   | Ye et al. (2017)    |                  |
| YRD    | Huainan             | 2015           | spring | 1.40   | Xia et al. (2017)   |                  |
| YRD    |                     | 2015           | summer | 1.29   | Xia et al. (2017)   |                  |
| YRD    |                     | 2015           | autumn | 2.40   | Xia et al. (2017)   |                  |
| YRD    |                     | 2015           | winter | 6.04   | Xia et al. (2017)   |                  |

**Continued Table S3**

| Region | Location  | Period    | Season | BC    | References           |
|--------|-----------|-----------|--------|-------|----------------------|
| YRD    | LinAn     | 2006      | annual | 4.80  | Zhang et al. (2008)  |
| YRD    |           | 2009-2010 | annual | 2.5   | Liu et al. (2013)    |
| YRD    |           | 2009-2010 | spring | 3.1   | Liu et al. (2013)    |
| YRD    | Ningbo    | 2009-2010 | summer | 0.8   | Liu et al. (2013)    |
| YRD    |           | 2009-2010 | autumn | 1.9   | Liu et al. (2013)    |
| YRD    |           | 2009-2010 | winter | 4.1   | Liu et al. (2013)    |
| PRD    |           | 2005      | spring | 10.70 | Wu et al. (2013)     |
| PRD    |           | 2005      | summer | 7.60  | Wu et al. (2013)     |
| PRD    |           | 2005      | autumn | 8.50  | Wu et al. (2013)     |
| PRD    |           | 2005      | winter | 7.50  | Wu et al. (2013)     |
| PRD    |           | 2009-2010 | annual | 6.0   | Tao et al. (2014c)   |
| PRD    |           | 2009      | spring | 6.1   | Tao et al. (2014c)   |
| PRD    |           | 2009      | summer | 3.5   | Tao et al. (2014c)   |
| PRD    |           | 2009      | autumn | 6.7   | Tao et al. (2014c)   |
| PRD    |           | 2010      | winter | 7.8   | Tao et al. (2014c)   |
| PRD    | Guangzhou | 2010      | spring | 4.60  | Wu et al. (2013)     |
| PRD    |           | 2010      | summer | 2.20  | Wu et al. (2013)     |
| PRD    |           | 2010      | autumn | 2.90  | Wu et al. (2013)     |
| PRD    |           | 2010      | winter | 10.30 | Wu et al. (2013)     |
| PRD    |           | 2014      | annual | 4.0   | Tao et al. (2017)    |
| PRD    |           | 2014      | spring | 4.2   | Tao et al. (2017)    |
| PRD    |           | 2014      | summer | 3.5   | Tao et al. (2017)    |
| PRD    |           | 2014      | autumn | 3.6   | Tao et al. (2017)    |
| PRD    |           | 2014      | winter | 5.0   | Tao et al. (2017)    |
| PRD    |           | 2000-2001 | annual | 5.4   | Louie et al. (2005a) |
| PRD    |           | 2000-2001 | spring | 5.3   | Louie et al. (2005b) |
| PRD    |           | 2000-2001 | summer | 6.0   | Louie et al. (2005b) |
| PRD    | Hong Kong | 2000-2001 | autumn | 4.7   | Louie et al. (2005b) |
| PRD    |           | 2000-2001 | winter | 5.0   | Louie et al. (2005b) |
| PRD    |           | 2004      | summer | 3.4   | Duan et al. (2007)   |
| PRD    |           | 2009-2010 | annual | 3.6   | Yau et al. (2013)    |
| PRD    |           | 2009      | annual | 4.7   | Huang et al. (2014)  |
| PRD    |           | 2019-2020 | annual | 2.79  | Chen et al. (2022)   |
| PRD    |           | 2019-2020 | spring | 1.9   | Chen et al. (2022)   |
| PRD    | Shenzhen  | 2019-2020 | summer | 2.67  | Chen et al. (2022)   |
| PRD    |           | 2019-2020 | autumn | 4.06  | Chen et al. (2022)   |
| PRD    |           | 2019-2020 | winter | 2.52  | Chen et al. (2022)   |

**Continued Table S3**

| Region | Location   | Period    | Season        | BC     | References             |                    |
|--------|------------|-----------|---------------|--------|------------------------|--------------------|
| PRD    | Panyu      | 2006      | annual        | 9.30   | Zhang et al. (2008)    |                    |
| PRD    | Wanqingsha | 2009      | autumn/winter | 5.5    | Fu et al. (2014)       |                    |
| SCB    |            | 2006      | annual        | 11.10  | Zhang et al. (2008)    |                    |
| SCB    |            | 2009-2010 | annual        | 9      | Tao et al. (2013)      |                    |
| SCB    |            | 2009-2010 | spring        | 5.7    | Tao et al. (2013)      |                    |
| SCB    |            | 2009-2010 | summer        | 7.1    | Tao et al. (2013)      |                    |
| SCB    | Chengdu    | 2009-2010 | autumn        | 11.6   | Tao et al. (2013)      |                    |
| SCB    |            | 2009-2010 | winter        | 11.6   | Tao et al. (2013)      |                    |
| SCB    |            | 2011      | spring        | 7.0    | Tao et al. (2014b)     |                    |
| SCB    |            | 2011      | autumn        | 7.0    | Tao et al. (2014b)     |                    |
| SCB    |            | 2011      | summer        | 6.0    | Tao et al. (2014b)     |                    |
| SCB    |            | 2011      | winter        | 8.0    | Tao et al. (2014b)     |                    |
| SCB    |            |           | 2005-2006     | annual | 6.4                    | Yang et al. (2011) |
| SCB    |            | Chongqing | 2019-2020     | annual | 2.45                   | Ding et al. (2022) |
| SCB    | 2020       |           | winter        | 5.1    | Chen et al. (2020)     |                    |
| Others | Akdala     | 2005      | annual        | 0.36   | Zhang et al. (2008)    |                    |
| Others | Baotou     | 2011-2012 | annual        | 2.7    | Zhang and Zhang (2014) |                    |
| Others | Changde    | 2006      | annual        | 2.30   | Zhang et al. (2008)    |                    |
| Others |            | 2013-2014 | spring        | 4.2    | Tang et al. (2017)     |                    |
| Others | Changsha   | 2013-2014 | summer        | 2.7    | Tang et al. (2017)     |                    |
| Others |            | 2013-2014 | autumn        | 3.9    | Tang et al. (2017)     |                    |
| Others |            | 2013-2014 | winter        | 6.0    | Tang et al. (2017)     |                    |
| Others | Dalian     | 2006      | annual        | 5.30   | Zhang et al. (2008)    |                    |
| Others | Dunhuang   | 2006      | annual        | 4.10   | Zhang et al. (2008)    |                    |
| Others | Ezhou      | 2020      | winter        | 2      | Wang et al. (2021)     |                    |
| Others | Gaolanshan | 2006      | annual        | 3.70   | Zhang et al. (2008)    |                    |
| Others |            | 2015      | annual        | 1.7    | Liu et al. (2017)      |                    |
| Others |            | 2015      | spring        | 1.6    | Liu et al. (2017)      |                    |
| Others | Haikou     | 2015      | summer        | 0.8    | Liu et al. (2017)      |                    |
| Others |            | 2015      | autumn        | 1.8    | Liu et al. (2017)      |                    |
| Others |            | 2015      | winter        | 2.4    | Liu et al. (2017)      |                    |
| Others | Huanggang  | 2020      | winter        | 3.7    | Wang et al. (2021)     |                    |
| Others | Huangshi   | 2020      | winter        | 3.8    | Wang et al. (2021)     |                    |
| Others |            | 2006-2007 | annual        | 4.1    | Yang et al. (2012)     |                    |
| Others | Jinan      | 2006-2007 | spring        | 3.3    | Yang et al. (2012)     |                    |
| Others |            | 2006-2007 | summer        | 3.1    | Yang et al. (2012)     |                    |
| Others |            | 2006-2007 | autumn        | 4.5    | Yang et al. (2012)     |                    |

**Continued Table S3**

| Region | Location     | Period    | Season | BC     | References          |
|--------|--------------|-----------|--------|--------|---------------------|
| Others | Jinan        | 2006-2007 | winter | 5.7    | Yang et al. (2012)  |
| Others |              | 2010      | annual | 5.3    | Gu et al. (2014)    |
| Others | Jinsha       | 2006      | annual | 3.2    | Zhang et al. (2008) |
| Others | Lanzhou      | 2014      | annual | 9.0    | Gu et al. (2014)    |
| Others |              | 2014      | spring | 6.7    | Gu et al. (2014)    |
| Others |              | 2014      | summer | 4.4    | Gu et al. (2014)    |
| Others |              | 2014      | autumn | 11.5   | Gu et al. (2014)    |
| Others |              | 2014      | winter | 13.4   | Gu et al. (2014)    |
| Others |              | 2014      | spring | 4.7    | Gu et al. (2014)    |
| Others |              | 2014      | summer | 2.8    | Gu et al. (2014)    |
| Others |              | 2014      | autumn | 8.5    | Gu et al. (2014)    |
| Others |              | 2014      | winter | 10.7   | Gu et al. (2014)    |
| Others |              | Lhasa     | 2006   | annual | 3.7                 |
| Others | Longfengshan | 2006      | annual | 2.4    | Zhang et al. (2008) |
| Others | Nanning      | 2006      | annual | 3.7    | Zhang et al. (2008) |
| Others | Qingdao      | 2020      | annual | 1.92   | Cui et al. (2021b)  |
| Others |              | 2020      | spring | 1.53   | Cui et al. (2021b)  |
| Others |              | 2020      | summer | 0.83   | Cui et al. (2021b)  |
| Others |              | 2020      | autumn | 1.73   | Cui et al. (2021b)  |
| Others |              | 2020      | winter | 3.65   | Cui et al. (2021b)  |
| Others | Qinghai Lake | 2010      | summer | 0.4    | Li et al. (2013)    |
| Others | Shangri-La   | 2005      | annual | 0.34   | Zhang et al. (2008) |
| Others | Urumqi       | 2019-2020 | summer | 2.77   | Xu et al. (2021)    |
| Others |              | 2019-2020 | autumn | 3.74   | Xu et al. (2021)    |
| Others |              | 2019-2020 | winter | 4.72   | Xu et al. (2021)    |
| Others | Taiyuan      | 2019-2020 | annual | 4.42   | Zheng et al. (2022) |
| Others |              | 2019-2020 | spring | 5.74   | Zheng et al. (2022) |
| Others |              | 2019-2020 | summer | 1.07   | Zheng et al. (2022) |
| Others |              | 2019-2020 | autumn | 11.6   | Zheng et al. (2022) |
| Others |              | 2019-2020 | winter | 1.22   | Zheng et al. (2022) |
| Others | Waliguan     | 2020      | winter | 0.28   | Xie et al. (2022)   |
| Others | Wuhan        | 2011-2012 | annual | 2.9    | Cheng et al. (2012) |
| Others |              | 2020      | winter | 2.5    | Wang et al. (2021)  |
| Others | Xi'an        | 2005      | annual | 13.6   | Geng et al. (2017)  |
| Others |              | 2010      | annual | 8      | Wang et al. (2015)  |



**Continued Table S3**

| Region | Location  | Period    | Season | BC   | References          |
|--------|-----------|-----------|--------|------|---------------------|
| Others |           | 2009-2010 | annual | 3.2  | Zhang et al. (2011) |
| Others |           | 2008-2011 | annual | 1.9  | Chen et al. (2012)  |
| Others |           | 2009-2010 | spring | 2.0  | Zhang et al. (2011) |
| Others |           | 2009-2010 | summer | 2.3  | Zhang et al. (2011) |
| Others | Xiamen    | 2009-2010 | autumn | 3.4  | Zhang et al. (2011) |
| Others |           | 2009-2010 | winter | 4.9  | Zhang et al. (2011) |
| Others |           | 2009-2010 | spring | 2.3  | Zhang et al. (2012) |
| Others |           | 2009-2010 | summer | 2.2  | Zhang et al. (2012) |
| Others |           | 2009-2010 | autumn | 3.0  | Zhang et al. (2012) |
| Others |           | 2009-2010 | winter | 4.2  | Zhang et al. (2012) |
| Others | Xianning  | 2020      | winter | 3.5  | Wang et al. (2021)  |
| Others | Xiaogan   | 2020      | winter | 3.1  | Wang et al. (2021)  |
| Others | Xinzhou   | 2020      | summer | 1.8  | Cai et al. (2022)   |
| Others | Yulin     | 2005      | annual | 4.00 | Zhang et al. (2008) |
| Others | Yuncheng  | 2020      | autumn | 4.5  | Li et al. (2022)    |
| Others |           | 2006      | annual | 9.40 | Zhang et al. (2008) |
| Others |           | 2010      | annual | 3.9  | Geng et al. (2013)  |
| Others |           | 2010      | spring | 3.0  | Geng et al. (2013)  |
| Others | Zhengzhou | 2010      | summer | 1.8  | Geng et al. (2013)  |
| Others |           | 2010      | autumn | 5.4  | Geng et al. (2013)  |
| Others |           | 2010      | winter | 4.7  | Geng et al. (2013)  |
| Others |           | 2014-2015 | annual | 11.0 | Wang et al. (2017a) |

**Table S4 Sensitivity tests designed to quantify the uncertainties to BC emission inversion caused by various factors.**

|        | Wavelength | Description                                                                                                                                                                                                                                                    | Uncertainty factors                            |
|--------|------------|----------------------------------------------------------------------------------------------------------------------------------------------------------------------------------------------------------------------------------------------------------------|------------------------------------------------|
| Base   | 483 nm     | Inversed BC emissions with OMI AAOD at 483 nm.<br>The contributions from BrC and dust AAOD are separated based on MERRA-2 fraction.                                                                                                                            | -                                              |
| Test 1 | 865 nm     | Inversed BC emissions with <b>extrapolated OMI AAOD at 865 nm</b> , at which the light absorption was seldom influenced by BrC.<br>The contribution from dust AAOD is separated based on MERRA-2 fraction.                                                     | Wavelength of AAOD (light-absorption from BrC) |
| Test 2 | 865 nm     | Inversed BC emissions with extrapolated OMI AAOD at 865 nm, at which the light absorption was seldom influenced by BrC.<br><b>The contribution from dust AAOD is separated based on CAMS fraction.</b>                                                         | Light-absorption from dust                     |
| Test 3 | 483 nm     | Inversed BC emissions with OMI AAOD at 483 nm.<br>The contributions from BrC and dust AAOD are separated based on MERRA-2 fraction.<br><b>The simulated MAE is adjusted based on available measurements.</b>                                                   | Simulated MAE                                  |
| Test 4 | 483 nm     | Inversed BC emissions with OMI AAOD at 483 nm.<br>The contributions from BrC and dust AAOD are separated based on MERRA-2 fraction.<br><b>The simulated BC lifetime in CMAQ model is adjusted to 5.5 days by changing the wet and dry removal rates of BC.</b> | Simulated BC lifetime                          |

**Table S5 MAE measurements collected from publications. Unit: m<sup>2</sup>/g.**

| Region | Site                   | Year      | Season | Wavelength | MAE        | Reference           |
|--------|------------------------|-----------|--------|------------|------------|---------------------|
| BTH    | Tsinghua University    | 2009      | Summer | 632        | 9.41±1.92  | Cheng et al. (2011) |
| BTH    | Tsinghua University    | 2009      | Winter | 632        | 8.45±1.71  |                     |
| BTH    | Beijing Mountain       | 2019      | Summer | 550        | 11± 1      | Ding et al. (2021)  |
| BTH    | Beijing Mountain       | 2019      | Winter | 550        | 10.7 ± 0.9 |                     |
| BTH    | Tiantongyuan community | 2014      | Annual | 632        | 10.2       | Ji et al. (2017)    |
| BTH    | IAPCAS                 | 2016      | Winter | 630        | 9.5-13.2   | Xie et al. (2019)   |
| BTH    | Wuqing                 | 2013      | Annual | 880        | 6.80±1.13  | Xing et al. (2014)  |
| BTH    | Wuqing                 | 2013      | Spring | 880        | 6.37±1.39  |                     |
| BTH    | Wuqing                 | 2013      | Summer | 880        | 8.48±1.25  |                     |
| BTH    | Wuqing                 | 2013      | Autumn | 880        | 6.36±1.82  |                     |
| BTH    | Wuqing                 | 2013      | Winter | 880        | 5.99±1.08  |                     |
| BTH    | Gucheng                | 2019      | Winter | 880        | 5.5        | Zhang et al. (2021) |
| BTH    | NCP                    | 2016      | Spring | 550        | 8.21±1.82  | Zhao et al. (2019a) |
| BTH    | NCP                    | 2016      | Winter | 550        | 8.75±0.18  |                     |
| YRD    | NJU                    | 2015-2017 | Summer | 678        | 9.20±0.25  | Chen et al. (2019a) |
| YRD    | NJU                    | 2015-2017 | Autumn | 678        | 8.47±0.57  |                     |
| YRD    | NJU                    | 2015-2017 | Winter | 678        | 8.70±0.48  |                     |
| YRD    | NUIST                  | 2015-2017 | Summer | 678        | 11.10±0.68 |                     |
| YRD    | NUIST                  | 2015-2017 | Autumn | 678        | 10.20±0.77 |                     |
| YRD    | NUIST                  | 2015-2017 | Winter | 678        | 10.50±0.98 |                     |

Continued Table S5

| Region | Site    | Year      | Season | Wavelength | MAE        | Reference           |
|--------|---------|-----------|--------|------------|------------|---------------------|
| YRD    | PAES    | 2015-2017 | Summer | 678        | 8.81±0.77  |                     |
| YRD    | PAES    | 2015-2017 | Autumn | 678        | 8.42±0.76  | Chen et al. (2019a) |
| YRD    | PAES    | 2015-2017 | Winter | 678        | 8.31±0.53  |                     |
| YRD    | NUIST   | 2013      | Spring | 781        | 11.2±2.9   |                     |
| YRD    | NUIST   | 2012-2013 | Summer | 781        | 9.9±1.9    | Cui et al. (2021a)  |
| YRD    | NUIST   | 2012      | Autumn | 781        | 7.2±1.9    |                     |
| YRD    | NUIST   | 2013      | Winter | 781        | 12.5±3.1   |                     |
| YRD    | Haining | 2013      | Annual | 880        | 8.11±1.87  |                     |
| YRD    | Haining | 2013      | Spring | 880        | 7.32       |                     |
| YRD    | Haining | 2013      | Summer | 880        | 9.67±0.70  | Xing et al. (2014)  |
| YRD    | Haining | 2013      | Autumn | 880        | 5.82±0.47  |                     |
| YRD    | Haining | 2013      | Winter | 880        | 9.6±3.6    |                     |
| PRD    | PKU-SZ  | 2011      | Summer | 532        | 6.5±0.5    | Lan et al. (2013)   |
| PRD    | SZ      | 2015      | Summer | 405        | 11.8       | Li et al. (2018)    |
| PRD    | SZ      | 2015      | Autumn | 405        | 13.4       |                     |
| PRD    | JNU     | 2017      | Summer | 520        | 10.73±4.96 | Sun et al. (2020)   |
| PRD    | JNU     | 2017-2018 | Winter | 520        | 18.47±5.49 |                     |
| PRD    | SCIES   | 2015-2016 | Annual | 550        | 9.3        |                     |
| PRD    | SCIES   | 2015-2016 | Spring | 550        | 10.1±1.0   | Tao et al. (2021)   |
| PRD    | SCIES   | 2015-2016 | Summer | 550        | 8.9±0.7    |                     |

Continued Table S5

| Region | Site      | Year      | Season | Wavelength | MAE        | Reference          |
|--------|-----------|-----------|--------|------------|------------|--------------------|
| PRD    | SCIES     | 2015-2016 | Autumn | 550        | 9.1±1.0    | Tao et al. (2021)  |
| PRD    | SCIES     | 2015-2016 | Winter | 550        | 9.1±0.7    |                    |
| PRD    | NC        | 2012-2013 | Annual | 550        | 18.75±6.16 | Wu et al. (2018a)  |
| PRD    | NC        | 2012-2013 | Spring | 550        | 19.91      |                    |
| PRD    | NC        | 2012-2013 | Summer | 550        | 22.18      |                    |
| PRD    | NC        | 2012-2013 | Autumn | 550        | 16.81      |                    |
| PRD    | NC        | 2012-2013 | Winter | 550        | 17.38      |                    |
| PRD    | Zhongshan | 2013      | Annual | 880        | 7.77±1.51  | Xing et al. (2014) |
| PRD    | Zhongshan | 2013      | Spring | 880        | 6.97       |                    |
| PRD    | Zhongshan | 2013      | Summer | 880        | 8.75       |                    |
| PRD    | Zhongshan | 2013      | Autumn | 880        | 9.22±1.27  |                    |
| PRD    | Zhongshan | 2013      | Winter | 880        | 5.94       |                    |
| SCB    | CRAES     | 2011      | Spring | 520        | 15.6±0.2   | Tao et al. (2014a) |
| SCB    | CRAES     | 2011      | Summer | 520        | 14.4±0.2   |                    |
| SCB    | CRAES     | 2011      | Autumn | 520        | 14.3±0.3   |                    |
| SCB    | CRAES     | 2011      | Winter | 520        | 10.5±0.1   |                    |
| SCB    | Deyang    | 2013      | Annual | 880        | 7.37±1.93  | Xing et al. (2014) |
| SCB    | Deyang    | 2013      | Spring | 880        | 5.18±0.38  |                    |
| SCB    | Deyang    | 2013      | Summer | 880        | 8.39       |                    |
| SCB    | Deyang    | 2013      | Autumn | 880        | 9.46±1.61  |                    |
| SCB    | Deyang    | 2013      | Winter | 880        | 6.43       |                    |

Continued Table S5

| Region | Site     | Year      | Season | Wavelength | MAE       | Reference           |                   |
|--------|----------|-----------|--------|------------|-----------|---------------------|-------------------|
| Others | Mt. Tai  | 2014      | Summer | 678        | 7.8±2.7   | Bai et al. (2018)   |                   |
| Others | SDUMS    | 2014      | Summer | 678        | 7.4±2.6   |                     |                   |
| Others | Qingdao  | 2018      | Summer | 678        | 7.12±1.82 | Cao et al. (2021)   |                   |
| Others | Qingdao  | 2018      | Autumn | 678        | 6.66±1.56 |                     |                   |
| Others | SDUMS    | 2014      | Winter | 678        | 9.0±2.3   | Chen et al. (2017a) |                   |
| Others | Beiluhe  | 2015-2016 | Annual | 632        | 11.8±6.60 | Chen et al. (2019b) |                   |
| Others | Everest  | 2014-2016 | Annual | 632        | 8.18±2.83 |                     |                   |
| Others | Lanzhou  | 2015-2016 | Annual | 632        | 7.07±4.08 |                     |                   |
| Others | Laohugou | 2015-2016 | Annual | 632        | 8.09±2.86 |                     |                   |
| Others | Lhasa    | 2013-2015 | Annual | 632        | 7.58±2.25 |                     |                   |
| Others | Lulang   | 2014-2015 | Annual | 632        | 8.65±1.55 |                     |                   |
| Others | Ngari    | 2015-2016 | Annual | 632        | 14.3±6.54 |                     |                   |
| Others | Nyalam   | 2013-2015 | Annual | 632        | 8.61±3.36 |                     |                   |
| Others | Yulong   | 2015-2016 | Annual | 632        | 7.43±3.03 |                     |                   |
| Others | Zhongba  | 2013-2015 | Annual | 632        | 8.04±2.79 |                     |                   |
| Others | Yucheng  | 2014      | Summer | 678        | 9.58±1.83 |                     | Cui et al. (2016) |
| Others | Lhasa    | 2013-2014 | Summer | 632        | 8.10±0.98 |                     | Hu et al. (2017)  |
| Others | Nam Co   | 2014      | Summer | 632        | 6.10±1.21 |                     |                   |
| Others | Ganhaizi | 2014-2016 | Annual | 632        | 6.25±0.46 | Niu et al. (2018)   |                   |
| Others | Ganhaizi | 2014-2016 | Spring | 632        | 5.68      |                     |                   |

**Continued Table S5**

| Region | Site     | Year      | Season | Wavelength | MAE       | Reference                |
|--------|----------|-----------|--------|------------|-----------|--------------------------|
| Others | Ganhaizi | 2014-2016 | Summer | 632        | 9.95      |                          |
| Others | Ganhaizi | 2014-2016 | Autumn | 632        | 5.83      |                          |
| Others | Ganhaizi | 2014-2016 | Winter | 632        | 3.53      |                          |
| Others | Yulong   | 2014-2016 | Annual | 632        | 7.38±1.01 | Niu et al. (2018)        |
| Others | Yulong   | 2014-2016 | Spring | 632        | 10.48     |                          |
| Others | Yulong   | 2014-2016 | Summer | 632        | 7.10      |                          |
| Others | Yulong   | 2014-2016 | Autumn | 632        | 3.78      |                          |
| Others | Yulong   | 2014-2016 | Winter | 632        | 5.36      |                          |
| Others | IIEECAS  | 2013      | Winter | 532        | 14.6±5.6  |                          |
| Others | Zhangye  | 2014      | Spring | 550        | 9.8       | Wu et al. (2018b)        |
| Others | Xian     | 2014      | Summer | 880        | 10.1      | Zhang et al. (2019)      |
| Others | Xian     | 2014      | Winter | 880        | 6.55      |                          |
| Others | Lanzhou  | 2015-2016 | Summer | 632        | 6.9       | Zhang and Kang<br>(2019) |
| Others | Lanzhou  | 2015-2016 | Winter | 632        | 7.5       |                          |
| Others | Lulang   | 2008-2009 | Annual | 405        | 6.07      | Zhao et al. (2019b)      |
| Others | Lulang   | 2008-2009 | Spring | 405        | 6.36      |                          |
| Others | Lulang   | 2008-2009 | Summer | 405        | 6.56      |                          |
| Others | Lulang   | 2008-2009 | Autumn | 405        | 6.17      |                          |
| Others | Lulang   | 2008-2009 | Winter | 405        | 4.92      |                          |

**Table S6 Comparison between the posterior simulated and measured MAE. OBS is mean measured MAE (at the wavelength of 483nm, m<sup>2</sup>/g), SIM is mean simulated MAE, BIAS is mean bias between SIM and OBS.**

| Comparison by Region |                            |                            |                             |         |        |                             |
|----------------------|----------------------------|----------------------------|-----------------------------|---------|--------|-----------------------------|
|                      | OBS<br>(m <sup>2</sup> /g) | SIM<br>(m <sup>2</sup> /g) | BIAS<br>(m <sup>2</sup> /g) | NMB     | NME    | RMSE<br>(m <sup>2</sup> /g) |
| BTH                  | 12.21                      | 10.14                      | -2.07                       | -16.97% | 18.06% | 2.62                        |
| YRD                  | 13.67                      | 10.23                      | -3.43                       | -15.17% | 25.34% | 3.11                        |
| PRD                  | 13.43                      | 10.26                      | -3.17                       | -19.59% | 24.16% | 3.74                        |
| SCB                  | 14.01                      | 10.30                      | -3.71                       | -21.55% | 28.32% | 4.64                        |
| Others               | 11.47                      | 10.13                      | -1.34                       | -10.97% | 17.69% | 2.89                        |

  

| Comparison by Season |                            |                            |                             |         |        |                             |
|----------------------|----------------------------|----------------------------|-----------------------------|---------|--------|-----------------------------|
|                      | OBS<br>(m <sup>2</sup> /g) | SIM<br>(m <sup>2</sup> /g) | BIAS<br>(m <sup>2</sup> /g) | NMB     | NME    | RMSE<br>(m <sup>2</sup> /g) |
| Annual               | 12.05                      | 10.23                      | -1.83                       | -15.16% | 19.63% | 3.38                        |
| Spring               | 11.85                      | 9.94                       | -1.92                       | -16.16% | 21.57% | 3.10                        |
| Summer               | 12.43                      | 10.05                      | -2.38                       | -19.17% | 23.58% | 3.76                        |
| Autumn               | 12.91                      | 10.48                      | -2.43                       | -18.80% | 23.03% | 3.93                        |
| Winter               | 12.71                      | 10.23                      | -2.48                       | -19.54% | 22.21% | 4.03                        |



**Table S7 Scenarios designed to quantify drivers (i.e., meteorology and emissions) of changes in premature mortality attributable to BC exposure.**

|                               | Simulation year | Year of the posterior emissions in China | Year of meteorological conditions |
|-------------------------------|-----------------|------------------------------------------|-----------------------------------|
| <i>BASE</i>                   | 2000            | 2000                                     | 2000                              |
|                               | 2005            | 2005                                     | 2005                              |
|                               | 2010            | 2010                                     | 2010                              |
|                               | 2015            | 2015                                     | 2015                              |
|                               | 2020            | 2020                                     | 2020                              |
| Fix emission ( <i>FE</i> )    | 2005            | 2000                                     | 2005                              |
|                               | 2010            | 2005                                     | 2010                              |
|                               | 2015            | 2010                                     | 2015                              |
|                               | 2020            | 2015                                     | 2020                              |
| Fix meteorology ( <i>FM</i> ) | 2000            | 2005                                     | 2000                              |
|                               | 2005            | 2010                                     | 2005                              |
|                               | 2010            | 2015                                     | 2010                              |
|                               | 2015            | 2020                                     | 2015                              |

**Table S8 Evaluation of the monthly XGBoost fitting in 10-fold cross validation and ground measurement validation.**

| Year | 10-fold Cross-Validation with OMI |        |        |        | Ground Measurement Validation |        |         |        |
|------|-----------------------------------|--------|--------|--------|-------------------------------|--------|---------|--------|
|      | Sample size                       | RMSE   | NMB    | NME    | Sample size                   | RMSE   | NMB     | NME    |
| 2001 | -                                 | -      | -      | -      | 13                            | 0.0249 | -7.79%  | 27.53% |
| 2002 | -                                 | -      | -      | -      | 14                            | 0.0172 | -11.93% | 23.55% |
| 2003 | -                                 | -      | -      | -      | 11                            | 0.0177 | -8.36%  | 22.48% |
| 2004 | -                                 | -      | -      | -      | 15                            | 0.0208 | -10.75% | 30.68% |
| 2005 | 51000                             | 0.0141 | -3.57% | 19.60% | 25                            | 0.0155 | -3.33%  | 21.08% |
| 2006 | 51944                             | 0.0140 | -3.42% | 19.10% | 44                            | 0.0204 | 10.83%  | 32.98% |
| 2007 | 56794                             | 0.0132 | -3.50% | 19.63% | 55                            | 0.0194 | 7.92%   | 36.54% |
| 2008 | 54778                             | 0.0135 | -3.54% | 19.56% | 97                            | 0.0183 | -1.46%  | 30.28% |
| 2009 | 47993                             | 0.0138 | -4.52% | 21.25% | 58                            | 0.0190 | 5.42%   | 33.08% |
| 2010 | 40893                             | 0.0129 | -4.18% | 20.43% | 68                            | 0.0165 | 5.29%   | 32.48% |
| 2011 | 41927                             | 0.0131 | -4.08% | 20.53% | 65                            | 0.0170 | 1.32%   | 31.29% |
| 2012 | 41830                             | 0.0147 | -4.21% | 20.78% | 70                            | 0.0131 | 8.19%   | 28.43% |
| 2013 | 44823                             | 0.0132 | -3.92% | 20.33% | 58                            | 0.0216 | 14.99%  | 36.43% |
| 2014 | 45600                             | 0.0119 | -3.64% | 20.01% | 52                            | 0.0182 | 6.81%   | 30.87% |
| 2015 | 36035                             | 0.0132 | -4.35% | 21.29% | 276                           | 0.0173 | 3.28%   | 34.97% |
| 2016 | 31593                             | 0.0130 | -4.41% | 21.34% | 177                           | 0.0177 | 4.58%   | 32.60% |
| 2017 | 28580                             | 0.0128 | -4.70% | 22.23% | 169                           | 0.0145 | 0.54%   | 29.42% |
| 2018 | 16004                             | 0.0119 | -4.62% | 21.64% | 244                           | 0.0163 | 1.49%   | 32.26% |

**Continued Table S8**

| Year | 10-fold Cross-Validation with OMI |        |        |        | Ground Measurements Validation |        |       |        |
|------|-----------------------------------|--------|--------|--------|--------------------------------|--------|-------|--------|
|      | Sample size                       | RMSE   | NMB    | NME    | Sample size                    | RMSE   | NMB   | NME    |
| 2019 | 7730                              | 0.0140 | -4.45% | 22.52% | 222                            | 0.0179 | 3.88% | 32.05% |
| 2020 | 4564                              | 0.0149 | -4.72% | 22.28% | 28                             | 0.0106 | 1.37% | 31.53% |

Note: The NMB, NME and RMSE were calculated using following equations (P and O indicate the results from XGBoost prediction and observation, respectively):

$$NMB = \frac{\sum_{i=1}^n (P_i - O_i)}{\sum_{i=1}^n O_i} \times 100\%; \quad NME = \frac{\sum_{i=1}^n |P_i - O_i|}{\sum_{i=1}^n O_i}; \quad RMSE = \sqrt{\frac{1}{n} \sum_{i=1}^n (P_i - O_i)^2}$$

**Table S9 Evaluation of the monthly XGBoost performance against OMI and ground measurements for different OMI coverage levels.**

|                    | OMI Coverage | BIAS    | RMSE   | NMB    | NME    |
|--------------------|--------------|---------|--------|--------|--------|
| OMI                | <20%         | -0.0024 | 0.0165 | -4.99% | 21.28% |
|                    | 20%-60%      | -0.0015 | 0.0130 | -3.68% | 19.98% |
|                    | >60%         | -0.0010 | 0.0101 | -3.37% | 20.58% |
| Ground measurement | <20%         | 0.0035  | 0.0186 | 8.75%  | 35.86% |
|                    | 20%-60%      | 0.0022  | 0.0178 | 4.73%  | 29.99% |
|                    | >60%         | 0.0011  | 0.0149 | 3.08%  | 31.43% |

**Table S10 Meteorology performance in 2000-2020 (with a five-year interval). OBS is mean observations, PRE is mean predictions, BIAS is mean bias, NMB is normalized mean bias, NME is normalized mean error, IOA is index of agreement. The benchmarks for temperature (BIAS within  $\pm 0.5$  K), wind speed (BIAS within  $\pm 0.5$  m/s) and wind direction (BIAS within  $\pm 10^\circ$ ) are suggested by Emery et al. (2001).**

| Parameter                        | Year | OBS   | PRE   | BIAS  | NMB    | NME   | IOA  |
|----------------------------------|------|-------|-------|-------|--------|-------|------|
| Temperature ( $^\circ\text{C}$ ) | 2000 | 11.9  | 10.8  | -1.1  | -9.0%  | 28.5% | 0.97 |
|                                  | 2005 | 12.7  | 11.6  | -1.1  | -8.3%  | 25.8% | 0.97 |
|                                  | 2010 | 12.2  | 11.9  | -0.3  | -2.1%  | 24.8% | 0.98 |
|                                  | 2015 | 12.8  | 12.4  | -0.3  | -2.5%  | 24.2% | 0.98 |
|                                  | 2020 | 12.7  | 12.1  | -0.6  | -4.7%  | 20.2% | 0.98 |
| Relative humidity (%)            | 2000 | 69.2  | 66.0  | -3.2  | -4.7%  | 19.6% | 0.81 |
|                                  | 2005 | 65.2  | 63.4  | -1.8  | -5.7%  | 20.3% | 0.81 |
|                                  | 2010 | 68.7  | 66.2  | -2.6  | -3.8%  | 20.9% | 0.84 |
|                                  | 2015 | 71.0  | 63.0  | -8.0  | -11.2% | 26.3% | 0.85 |
|                                  | 2020 | 67.6  | 62.4  | -5.3  | -7.8%  | 20.1% | 0.86 |
| Wind speed (m/s)                 | 2000 | 2.5   | 3.5   | 1.0   | 31.9%  | 68.9% | 0.64 |
|                                  | 2005 | 2.5   | 3.2   | 0.7   | 34.9%  | 77.6% | 0.63 |
|                                  | 2010 | 2.5   | 3.0   | 0.5   | 32.5%  | 72.7% | 0.66 |
|                                  | 2015 | 2.6   | 3.4   | 0.8   | 30.3%  | 73.6% | 0.66 |
|                                  | 2020 | 2.5   | 3.0   | 0.5   | 30.9%  | 66.3% | 0.69 |
| Wind direction ( $^\circ$ )      | 2000 | 147.2 | 173.6 | 26.4  | 17.9%  | 76.3% | 0.57 |
|                                  | 2005 | 171.4 | 179.6 | 8.2   | 4.8%   | 58.1% | 0.59 |
|                                  | 2010 | 168.5 | 164.1 | -4.4  | -2.6%  | 58.4% | 0.61 |
|                                  | 2015 | 177.9 | 163.9 | -14.0 | -7.9%  | 56.3% | 0.60 |
|                                  | 2020 | 176.1 | 172.5 | -3.6  | -2.0%  | 48.9% | 0.65 |

**Table S11 Comparison between XGBoost predictions and simulations for 2000-2020 (with a five-year interval). BIAS is mean bias between simulated and XGBoost predicted BC AAOD.**

| Year | Month | The prior simulation |      |         |        |       | The posterior simulation |      |        |        |       |
|------|-------|----------------------|------|---------|--------|-------|--------------------------|------|--------|--------|-------|
|      |       | BIAS                 | R    | NMB     | NME    | RMSE  | BIAS                     | R    | NMB    | NME    | RMSE  |
| 2000 | 1     | -0.024               | 0.57 | -47.19% | 48.05% | 0.032 | 0.007                    | 0.79 | 13.8%  | 27.3%  | 0.019 |
| 2000 | 4     | -0.034               | 0.76 | -75.11% | 75.19% | 0.038 | -0.001                   | 0.88 | -1.86% | 15.61% | 0.01  |
| 2000 | 7     | -0.041               | 0.15 | -82.11% | 82.17% | 0.049 | -0.003                   | 0.73 | -6.87% | 27.68% | 0.019 |
| 2000 | 10    | -0.028               | 0.69 | -73.55% | 73.62% | 0.032 | 0.000                    | 0.91 | -0.46% | 16.97% | 0.008 |
| 2005 | 1     | -0.032               | 0.53 | -47.9%  | 49.53% | 0.045 | 0.008                    | 0.75 | 12.3%  | 25.71% | 0.026 |
| 2005 | 4     | -0.046               | 0.76 | -75.68% | 75.79% | 0.05  | 0.000                    | 0.9  | -0.05% | 14.66% | 0.012 |
| 2005 | 7     | -0.044               | 0.16 | -80.23% | 80.31% | 0.052 | -0.003                   | 0.74 | -4.85% | 25.99% | 0.019 |
| 2005 | 10    | -0.028               | 0.76 | -59.72% | 60.34% | 0.035 | 0.003                    | 0.92 | 6.3%   | 18.07% | 0.011 |
| 2010 | 1     | -0.016               | 0.77 | -31.91% | 35.37% | 0.023 | 0.004                    | 0.89 | 8.25%  | 18.18% | 0.013 |
| 2010 | 4     | -0.039               | 0.74 | -77.26% | 77.31% | 0.043 | -0.002                   | 0.85 | -3.83% | 17.54% | 0.012 |
| 2010 | 7     | -0.039               | 0.22 | -75.36% | 75.6%  | 0.046 | 0.001                    | 0.73 | 2.44%  | 27.7%  | 0.018 |
| 2010 | 10    | -0.026               | 0.84 | -58.95% | 59.35% | 0.033 | 0.003                    | 0.95 | 6.85%  | 16.34% | 0.01  |
| 2015 | 1     | -0.014               | 0.81 | -29.22% | 33.83% | 0.02  | 0.006                    | 0.91 | 12.73% | 18.93% | 0.012 |
| 2015 | 4     | -0.04                | 0.84 | -77.07% | 77.13% | 0.044 | -0.001                   | 0.91 | -1.65% | 14.51% | 0.01  |
| 2015 | 7     | -0.032               | 0.55 | -69.8%  | 69.89% | 0.036 | -0.001                   | 0.86 | -3.2%  | 17.52% | 0.011 |
| 2015 | 10    | -0.021               | 0.86 | -53.58% | 54.27% | 0.028 | 0.003                    | 0.95 | 8.51%  | 16.78% | 0.009 |

**Continued Table S11**

| Year | Month | The prior simulation |      |         |        |       | The posterior simulation |      |        |        |       |
|------|-------|----------------------|------|---------|--------|-------|--------------------------|------|--------|--------|-------|
|      |       | BIAS                 | R    | NMB     | NME    | RMSE  | BIAS                     | R    | NMB    | NME    | RMSE  |
| 2020 | 1     | -0.038               | 0.59 | -59.56% | 59.8%  | 0.048 | 0.007                    | 0.88 | 10.5%  | 22.44% | 0.019 |
| 2020 | 4     | -0.036               | 0.7  | -74.71% | 74.81% | 0.04  | 0.000                    | 0.79 | -0.29% | 18.31% | 0.013 |
| 2020 | 7     | -0.038               | 0.24 | -85.03% | 85.07% | 0.044 | -0.005                   | 0.75 | -10.7% | 28.22% | 0.017 |
| 2020 | 10    | -0.03                | 0.82 | -74.12% | 74.19% | 0.038 | 0.001                    | 0.94 | 2.9%   | 17.78% | 0.01  |

Note: The BIAS, NMB, NME and RMSE were calculated using following equations (P and O indicate the results from model simulation and XGBoost prediction, respectively):

$$BIAS = \frac{1}{n} \sum_{i=1}^n (P_i - O_i); NMB = \frac{\sum_{i=1}^n (P_i - O_i)}{\sum_{i=1}^n O_i} \times 100\%; NME = \frac{\sum_{i=1}^n |P_i - O_i|}{\sum_{i=1}^n O_i}; RMSE = \sqrt{\frac{1}{n} \sum_{i=1}^n (P_i - O_i)^2}$$

**Table S12 Total premature mortality associated with BC exposure and drivers of changing premature mortality by province during 2000-2020 with five-year interval (Unit: thousand cases). The red and blue present the increase and reduction of premature mortality associated to changing drivers, and darker colors indicate greater changes in premature mortality.**

|                | 2000 | P    | PS  | B    | EMI  | MET  | 2005 | P    | PS   | B    | EMI   | MET   | 2010 | P    | PS   | B     | EMI   | MET | 2015 | P    | PS   | B    | EMI   | MET  | 2020 |
|----------------|------|------|-----|------|------|------|------|------|------|------|-------|-------|------|------|------|-------|-------|-----|------|------|------|------|-------|------|------|
| Anhui          | 30.6 | -0.1 | 4.6 | -3.2 | 8.5  | 4.5  | 44.8 | -0.4 | 7.0  | -6.2 | 10.1  | -8.0  | 47.3 | -0.3 | 7.7  | -6.6  | -1.9  | 1.5 | 47.8 | -0.9 | 5.8  | -2.7 | -8.5  | 3.8  | 45.0 |
| Beijing        | 6.6  | 1.5  | 1.1 | -0.7 | 2.1  | 0.5  | 11.0 | 2.0  | 1.8  | -1.6 | 0.1   | -0.8  | 12.5 | 2.3  | 2.2  | -1.9  | -0.2  | 0.0 | 14.9 | 2.4  | 2.1  | -1.0 | 0.2   | -0.4 | 18.5 |
| Chongqing      | 19.9 | -0.7 | 2.6 | -1.8 | 0.6  | 1.8  | 22.4 | -0.9 | 3.2  | -2.8 | -1.6  | -0.7  | 19.6 | -0.7 | 2.9  | -2.5  | -5.5  | 2.2 | 16.1 | -1.0 | 2.4  | -1.1 | -0.3  | 2.8  | 18.8 |
| Fujian         | 9.8  | 0.3  | 1.2 | -0.9 | 0.0  | 0.1  | 10.5 | 0.2  | 1.7  | -1.5 | -3.8  | 4.8   | 11.9 | 0.3  | 1.8  | -1.5  | -5.3  | 2.3 | 9.6  | 0.2  | 1.3  | -0.6 | 0.7   | -1.0 | 10.1 |
| Gansu          | 9.6  | 0.1  | 1.4 | -1.0 | 2.0  | 0.6  | 12.7 | 0.0  | 1.6  | -1.4 | -4.0  | -0.7  | 8.2  | 0.0  | 1.3  | -1.1  | -1.7  | 0.5 | 7.2  | -0.1 | 1.1  | -0.5 | 0.4   | 1.5  | 9.5  |
| Guangdong      | 26.8 | 2.6  | 3.6 | -2.5 | -4.5 | 5.9  | 31.8 | 2.8  | 5.3  | -4.7 | 14.5  | -11.4 | 38.4 | 2.9  | 5.6  | -4.7  | -21.5 | 9.1 | 29.8 | 2.3  | 4.3  | -2.0 | 0.3   | 0.0  | 34.6 |
| Guangxi        | 16.6 | 0.4  | 2.4 | -1.7 | 0.5  | 4.5  | 22.8 | 0.3  | 3.5  | -3.1 | 0.1   | -0.1  | 23.4 | 0.3  | 3.3  | -2.8  | -11.3 | 4.1 | 17.1 | 0.0  | 2.4  | -1.1 | 0.4   | 0.4  | 19.2 |
| Guizhou        | 19.3 | -0.2 | 2.6 | -1.8 | 0.4  | 2.2  | 22.5 | -0.3 | 3.2  | -2.8 | -0.4  | -2.6  | 19.6 | -0.2 | 3.3  | -2.8  | -6.1  | 7.3 | 21.1 | -0.5 | 3.0  | -1.4 | 1.3   | -0.2 | 23.3 |
| Hainan         | 1.7  | 0.1  | 0.2 | -0.2 | -0.1 | 0.4  | 2.2  | 0.1  | 0.3  | -0.3 | 0.0   | 0.0   | 2.4  | 0.1  | 0.3  | -0.3  | -1.6  | 0.7 | 1.6  | 0.1  | 0.3  | -0.1 | 0.6   | -0.3 | 2.2  |
| Hebei          | 36.7 | 1.4  | 5.1 | -3.6 | 6.2  | 1.4  | 47.2 | 1.2  | 7.0  | -6.2 | -7.3  | 2.9   | 44.9 | 1.2  | 7.5  | -6.3  | -0.2  | 0.0 | 47.0 | 0.7  | 7.0  | -3.3 | 0.0   | 5.8  | 57.2 |
| Heilongjiang   | 42.5 | 1.4  | 5.2 | -3.7 | 1.6  | -4.4 | 42.7 | 1.2  | 7.0  | -6.2 | 3.8   | 2.0   | 50.4 | 1.4  | 8.6  | -7.3  | -0.8  | 2.8 | 55.1 | 0.7  | 7.3  | -3.4 | -11.6 | 4.9  | 53.1 |
| Henan          | 61.9 | 0.9  | 8.5 | -6.0 | 7.1  | 5.1  | 77.6 | 0.3  | 11.0 | -9.7 | -13.6 | 1.9   | 67.5 | 0.4  | 10.8 | -9.1  | -5.8  | 1.1 | 64.8 | -0.3 | 10.3 | -4.8 | 7.2   | 11.8 | 88.9 |
| Hubei          | 31.5 | -0.7 | 4.7 | -3.3 | 8.8  | 4.6  | 45.6 | -1.0 | 6.9  | -6.1 | -0.8  | 0.1   | 44.7 | -0.8 | 6.5  | -5.5  | -11.7 | 1.8 | 35.1 | -1.2 | 4.9  | -2.3 | -0.1  | 1.9  | 38.2 |
| Hunan          | 34.7 | 0.6  | 5.0 | -3.5 | 6.4  | 4.9  | 48.1 | 0.3  | 7.0  | -6.2 | -3.2  | -2.1  | 43.8 | 0.3  | 6.5  | -5.5  | -9.4  | 0.6 | 36.2 | -0.2 | 5.5  | -2.6 | 0.1   | 6.8  | 45.9 |
| Inner Mongolia | 7.4  | 0.2  | 1.0 | -0.7 | 1.4  | 0.1  | 9.4  | 0.1  | 1.3  | -1.1 | -1.7  | -0.6  | 7.4  | 0.1  | 1.1  | -1.0  | -2.0  | 0.9 | 6.5  | 0.0  | 1.0  | -0.5 | -4.2  | 5.5  | 8.3  |
| Jiangsu        | 34.4 | 0.9  | 5.0 | -3.5 | 7.4  | 4.3  | 48.4 | 1.0  | 8.0  | -7.1 | 14.6  | -7.1  | 57.8 | 1.5  | 10.1 | -8.6  | 0.7   | 5.8 | 67.3 | 0.8  | 8.2  | -3.8 | -20.5 | 1.8  | 53.9 |
| Jiangxi        | 14.9 | 0.8  | 2.2 | -1.5 | 0.5  | 4.2  | 21.0 | 0.8  | 3.2  | -2.8 | 4.7   | -5.6  | 21.3 | 0.8  | 3.2  | -2.7  | -6.0  | 1.4 | 17.9 | 0.5  | 2.7  | -1.3 | 0.1   | 2.5  | 22.5 |
| Jilin          | 40.0 | 0.4  | 4.8 | -3.4 | -0.7 | -2.6 | 38.5 | 0.1  | 5.9  | -5.3 | 7.6   | -7.1  | 39.9 | 0.2  | 6.6  | -5.6  | -1.0  | 0.9 | 41.0 | -0.4 | 5.2  | -2.4 | -9.8  | 2.8  | 36.4 |
| Liaoning       | 52.2 | 1.0  | 5.8 | -4.1 | -3.5 | -8.9 | 42.5 | 0.5  | 6.3  | -5.6 | 10.6  | -13.5 | 40.9 | 0.5  | 6.2  | -5.3  | -13.1 | 6.1 | 35.4 | 0.0  | 4.7  | -2.2 | -7.0  | 3.2  | 34.0 |
| Ningxia        | 1.6  | 0.1  | 0.2 | -0.2 | 0.5  | 0.0  | 2.4  | 0.1  | 0.3  | -0.3 | -0.9  | 0.0   | 1.6  | 0.1  | 0.3  | -0.2  | -0.2  | 0.1 | 1.7  | 0.1  | 0.3  | -0.1 | 0.2   | 0.2  | 2.3  |
| Qinghai        | 1.5  | 0.1  | 0.2 | -0.1 | 0.2  | 0.0  | 1.8  | 0.1  | 0.2  | -0.2 | -0.5  | -0.2  | 1.2  | 0.1  | 0.2  | -0.2  | -0.3  | 0.1 | 1.1  | 0.1  | 0.2  | -0.1 | -0.5  | 0.9  | 1.7  |
| Shandong       | 46.2 | 1.3  | 6.9 | -4.8 | 13.5 | 3.8  | 66.9 | 1.1  | 10.4 | -9.2 | 1.0   | 0.2   | 70.3 | 1.2  | 11.9 | -10.1 | -2.6  | 5.5 | 76.3 | 0.2  | 10.7 | -5.0 | -1.8  | 1.4  | 81.8 |



**Continued Table S12**

|          | 2000 | P    | PS  | B    | EMI | MET  | 2005 | P    | PS   | B    | EMI   | MET  | 2010 | P    | PS  | B    | EMI   | MET  | 2015 | P    | PS  | B    | EMI   | MET  | 2020 |
|----------|------|------|-----|------|-----|------|------|------|------|------|-------|------|------|------|-----|------|-------|------|------|------|-----|------|-------|------|------|
| Shanghai | 9.2  | 1.6  | 1.2 | -0.9 | 0.8 | -0.9 | 11.0 | 2.0  | 1.9  | -1.7 | 9.9   | -8.6 | 14.5 | 2.5  | 2.6 | -2.2 | -0.2  | 0.6  | 17.8 | 2.2  | 2.1 | -1.0 | -10.7 | 1.9  | 12.3 |
| Shaanxi  | 19.9 | 0.5  | 2.7 | -1.9 | 2.5 | 1.1  | 24.8 | 0.3  | 3.4  | -3.0 | -5.9  | 0.0  | 19.5 | 0.3  | 2.9 | -2.5 | -5.9  | 2.1  | 16.5 | 0.0  | 2.7 | -1.3 | 2.4   | 3.5  | 23.8 |
| Shanxi   | 29.6 | 1.4  | 3.8 | -2.7 | 0.6 | 0.0  | 32.7 | 1.0  | 4.1  | -3.6 | -14.3 | 0.6  | 20.5 | 0.8  | 3.3 | -2.8 | -2.3  | 0.4  | 19.9 | 0.6  | 3.5 | -1.7 | 6.2   | 4.7  | 33.3 |
| Sichuan  | 59.2 | -1.3 | 7.9 | -5.6 | 7.5 | 3.0  | 70.7 | -1.6 | 10.1 | -8.9 | -8.4  | 0.3  | 62.2 | -0.9 | 9.2 | -7.7 | -19.3 | 6.7  | 50.1 | -1.3 | 7.0 | -3.3 | -1.3  | 2.6  | 53.9 |
| Tianjin  | 5.5  | 0.8  | 0.8 | -0.6 | 0.7 | 0.2  | 7.4  | 1.0  | 1.3  | -1.1 | 0.2   | 0.6  | 9.4  | 1.2  | 1.7 | -1.4 | -0.2  | 0.5  | 11.2 | 1.3  | 1.7 | -0.8 | 1.2   | -1.1 | 13.6 |
| Xinjiang | 1.2  | 0.1  | 0.2 | -0.1 | 0.3 | 0.2  | 1.9  | 0.1  | 0.3  | -0.2 | 0.0   | -0.5 | 1.6  | 0.1  | 0.3 | -0.2 | -0.4  | 0.2  | 1.6  | 0.1  | 0.3 | -0.1 | 0.3   | 0.3  | 2.5  |
| Tibet    | 0.1  | 0.0  | 0.0 | 0.0  | 0.0 | 0.0  | 0.1  | 0.0  | 0.0  | 0.0  | 0.0   | 0.0  | 0.1  | 0.0  | 0.0 | 0.0  | 0.0   | 0.0  | 0.1  | 0.0  | 0.0 | 0.0  | 0.0   | 0.0  | 0.1  |
| Yunnan   | 16.2 | 0.7  | 2.2 | -1.5 | 0.9 | 1.5  | 19.9 | 0.6  | 2.9  | -2.6 | 0.5   | -2.4 | 18.9 | 0.6  | 3.1 | -2.6 | -1.9  | 1.3  | 19.4 | 0.3  | 2.8 | -1.3 | 3.4   | -1.7 | 22.9 |
| Zhejiang | 14.4 | 1.3  | 2.0 | -1.4 | 0.2 | 2.1  | 18.5 | 1.5  | 3.0  | -2.7 | -11.4 | 12.7 | 21.6 | 1.8  | 3.7 | -3.1 | -10.8 | 11.0 | 24.1 | 1.5  | 3.2 | -1.5 | -10.0 | 5.7  | 23.0 |

**Table S13 The concentration-response coefficients and corresponding all-cause premature deaths attributed to BC exposure estimated in this study for China.**

| $\beta_{BC}$ (95% CI)  | Reference                | Description                                                                                                        | Premature mortality in thousand (95% CI) |
|------------------------|--------------------------|--------------------------------------------------------------------------------------------------------------------|------------------------------------------|
| 0.020<br>(0.019-0.022) | Chen et al.<br>(2021)    | A prospective cohort in Deqing of Zhejiang, China.                                                                 | 734~938<br>(677, 1023)                   |
| 0.058<br>(0.049-0.068) | Janssen et al.<br>(2011) | A meta-analysis of time-series studies conducted in the United States and European countries.                      | 1851~2386<br>(1596, 2700)                |
| 0.006<br>(0.005-0.007) | Krewski et al.<br>(2009) | A prospective cohort study that includes a large population (500,000 adults) over 116 cities in the United States. | 221~281<br>(185, 326)                    |

## Figures

**Figure S1 Definition of (a) provinces, key regions and observation sites and (b) land-use types of study domain. (a) The large rectangle presents the simulation domain of CMAQ model. The small rectangle presents the Eastern China. Regions apart from the Eastern China were defined as the rest of China. Chinese mainland, Hong Kong, Macao and Taiwan are study domain of XGBoost model. The blue circles present the locations of AAOD monitoring sites (including 116 sites from four aerosol monitoring networks), the green triangles present the locations of BC concentration monitoring sites collected from literatures (Supplementary Table S5), the red rectangles present the locations of MAE measured sites collected from literatures (Supplementary Table S6). Key regions are presented by different blue filling. BTH represents Beijing-Tianjin-Hebei, YRD represents Yangtze River Delta, PRD represents Pearl River Delta, FWP represents Fenwei Plain, SCB represents Sichuan Basin and NE represents Northeastern China. (b) Spatial distribution of different land-use types of China.**

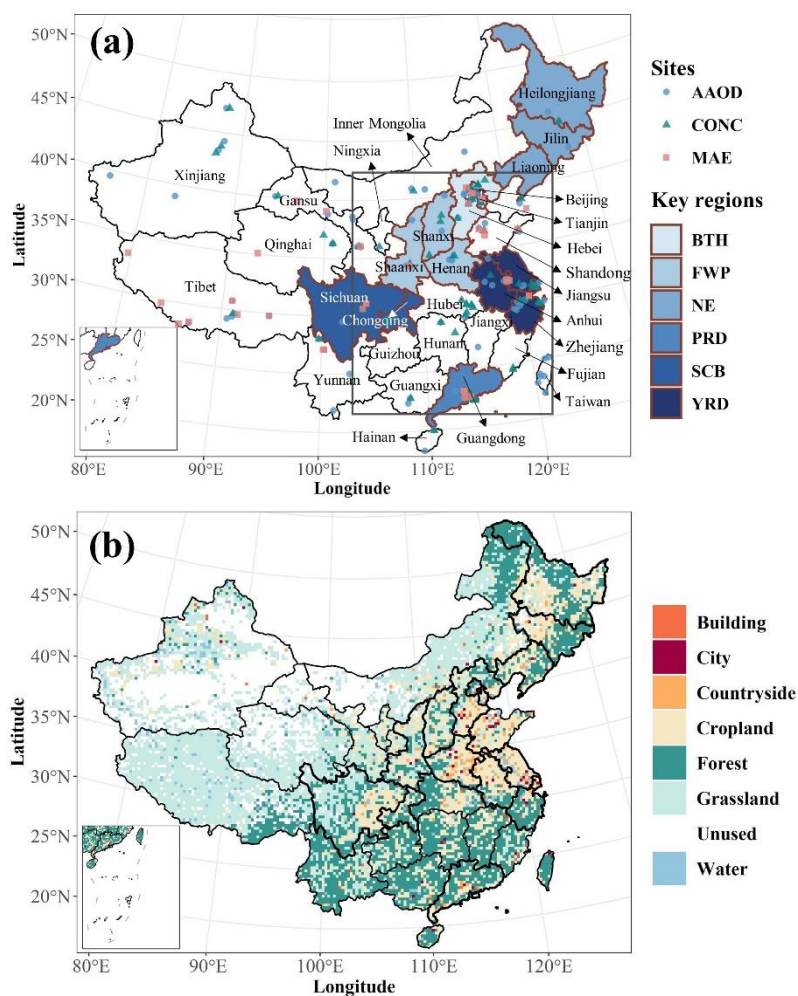

**Figure S2 Spatial distribution of multiyear annual average OMI AAOD coverage.**

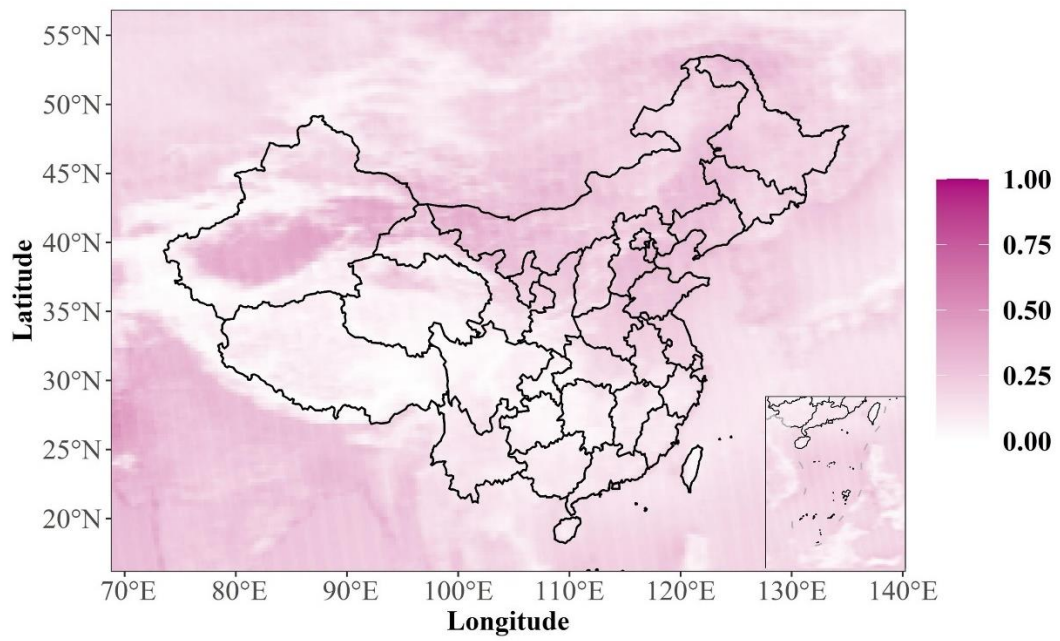

**Figure S3 Multiyear average fractions of dust AAOD to AAOD from MERRA-2 (a) and CAMS (b).**

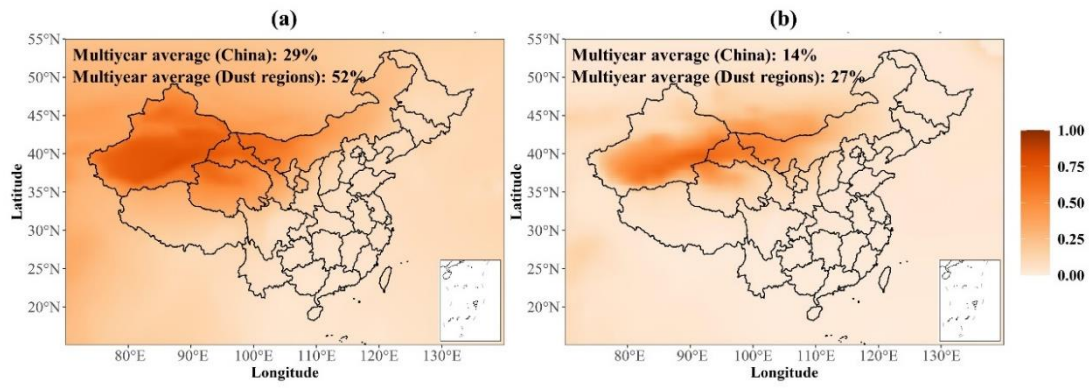

**Figure S4 WRF-CMAQ simulated daily BC lifetimes for different months in base case and Test 4. The boxes represent the 25th to 75th percentiles of the distributions while the solid lines within each box represent the means.**

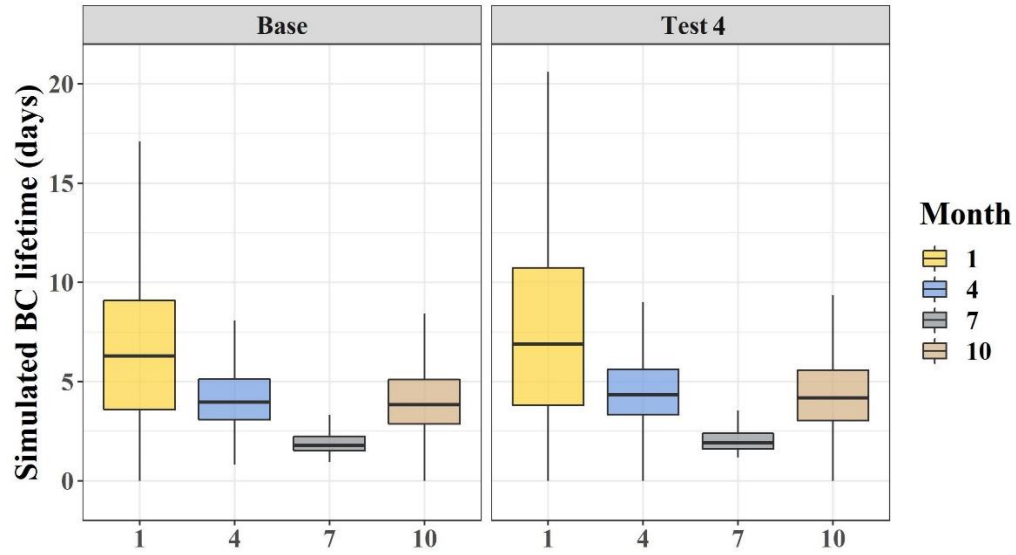

Figure S5 Comparison between XGBoost prediction and ground observation AAOD for regional representative sites in 2000-2020. N represents number of monthly observation data.

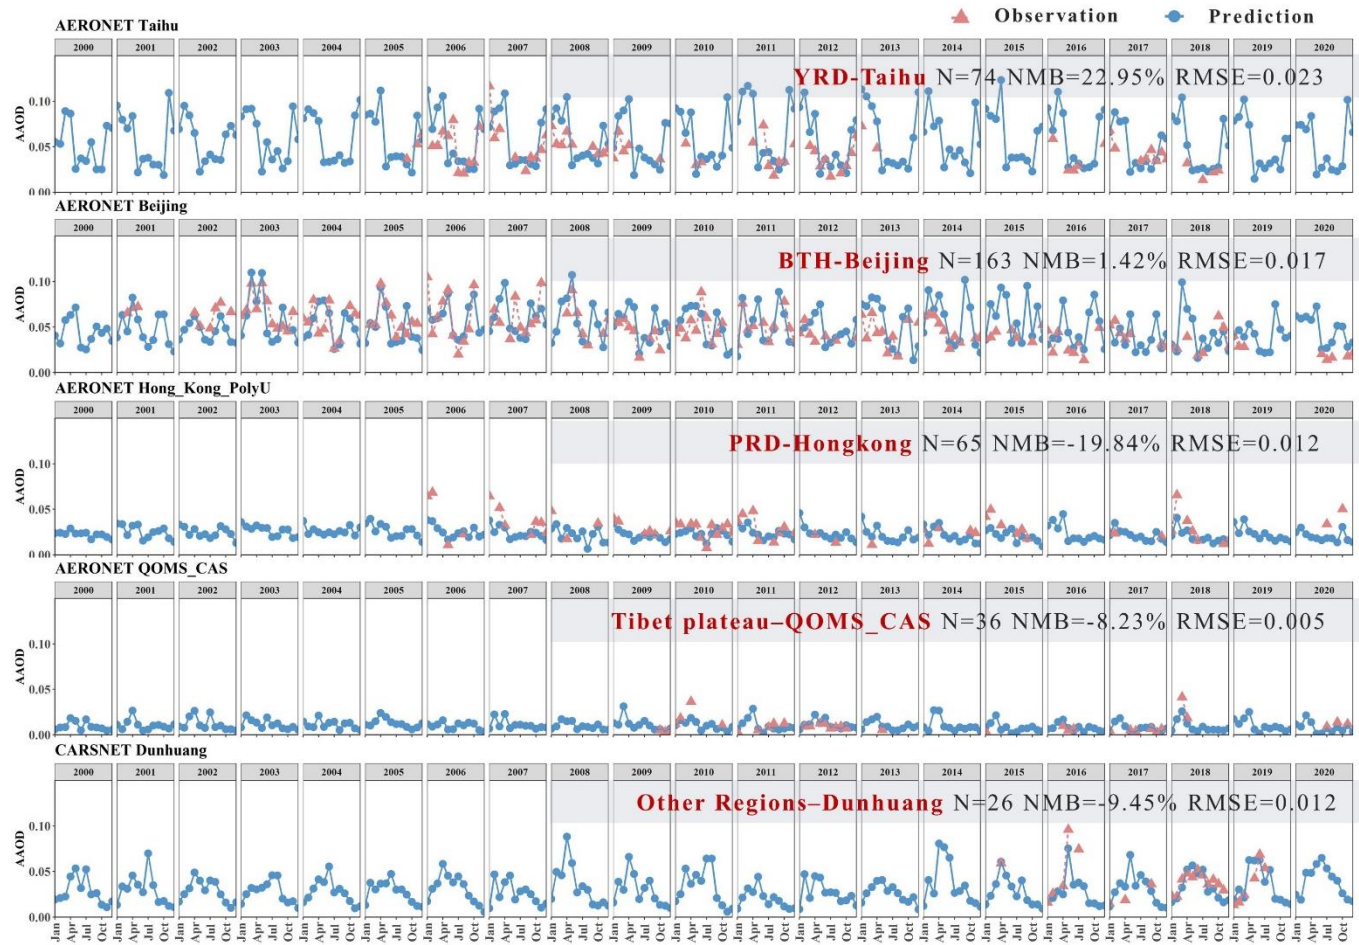

**Figure S6 Evaluation of the prior (blued dots) and posterior (red dots) simulated monthly surface BC concentration in China by year with observations collected from publications (from 2000-2020, with a five-year-interval). The BIAS, NMB, NME, slope of the linear fitting (SLOPE) and number of samples (NUM.) are provided in the top left corner.**

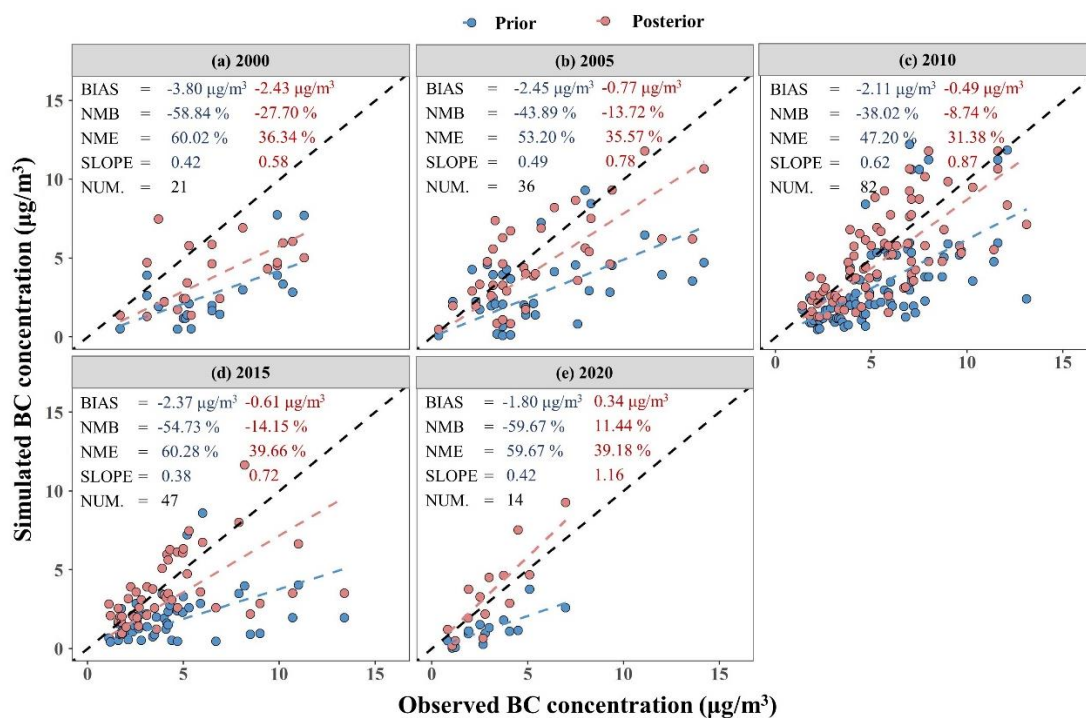

Note: The BIAS, NMB and NME were calculated using following equations (P and O indicate the results from model simulation and observation, respectively):

$$BIAS = \frac{1}{n} \sum_{i=1}^n (P_i - O_i)$$

$$NMB = \frac{\sum_{i=1}^n (P_i - O_i)}{\sum_{i=1}^n O_i} \times 100\%$$

$$NME = \frac{\sum_{i=1}^n |P_i - O_i|}{\sum_{i=1}^n O_i}$$



**Figure S7 Evaluation of the prior (blued dots) and posterior (red dots) simulated monthly surface BC concentration of different land-use types in China with observations collected from publications (from 2000-2020, with a five-year-interval). The BIAS, NMB, NME, slope of the linear fitting (SLOPE) and number of samples (NUM.) are provided in the top left corner.**

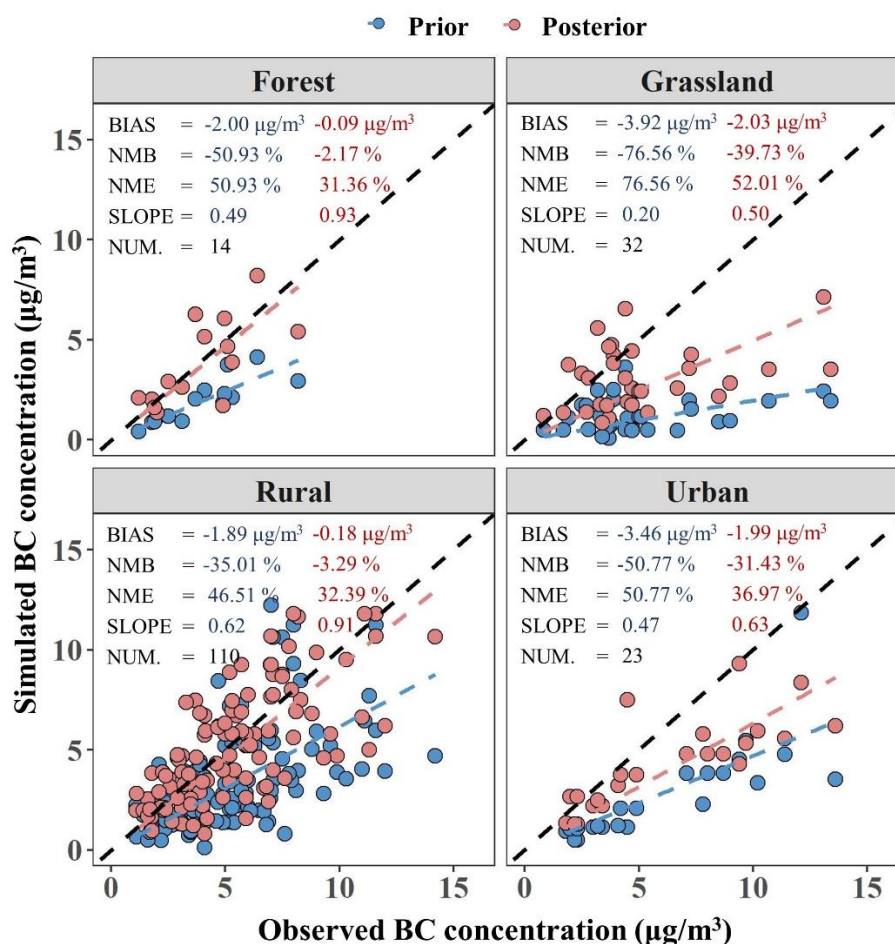

Note: The BIAS, NMB and NME were calculated using following equations (P and O indicate the results from model simulation and observation, respectively):

$$BIAS = \frac{1}{n} \sum_{i=1}^n (P_i - O_i)$$

$$NMB = \frac{\sum_{i=1}^n (P_i - O_i)}{\sum_{i=1}^n O_i} \times 100\%$$

$$NME = \frac{\sum_{i=1}^n |P_i - O_i|}{\sum_{i=1}^n O_i}$$

**Figure S8 Spatial distribution of premature mortality attributable to the posterior BC exposure during 2000-2020 (with a five-year interval).**

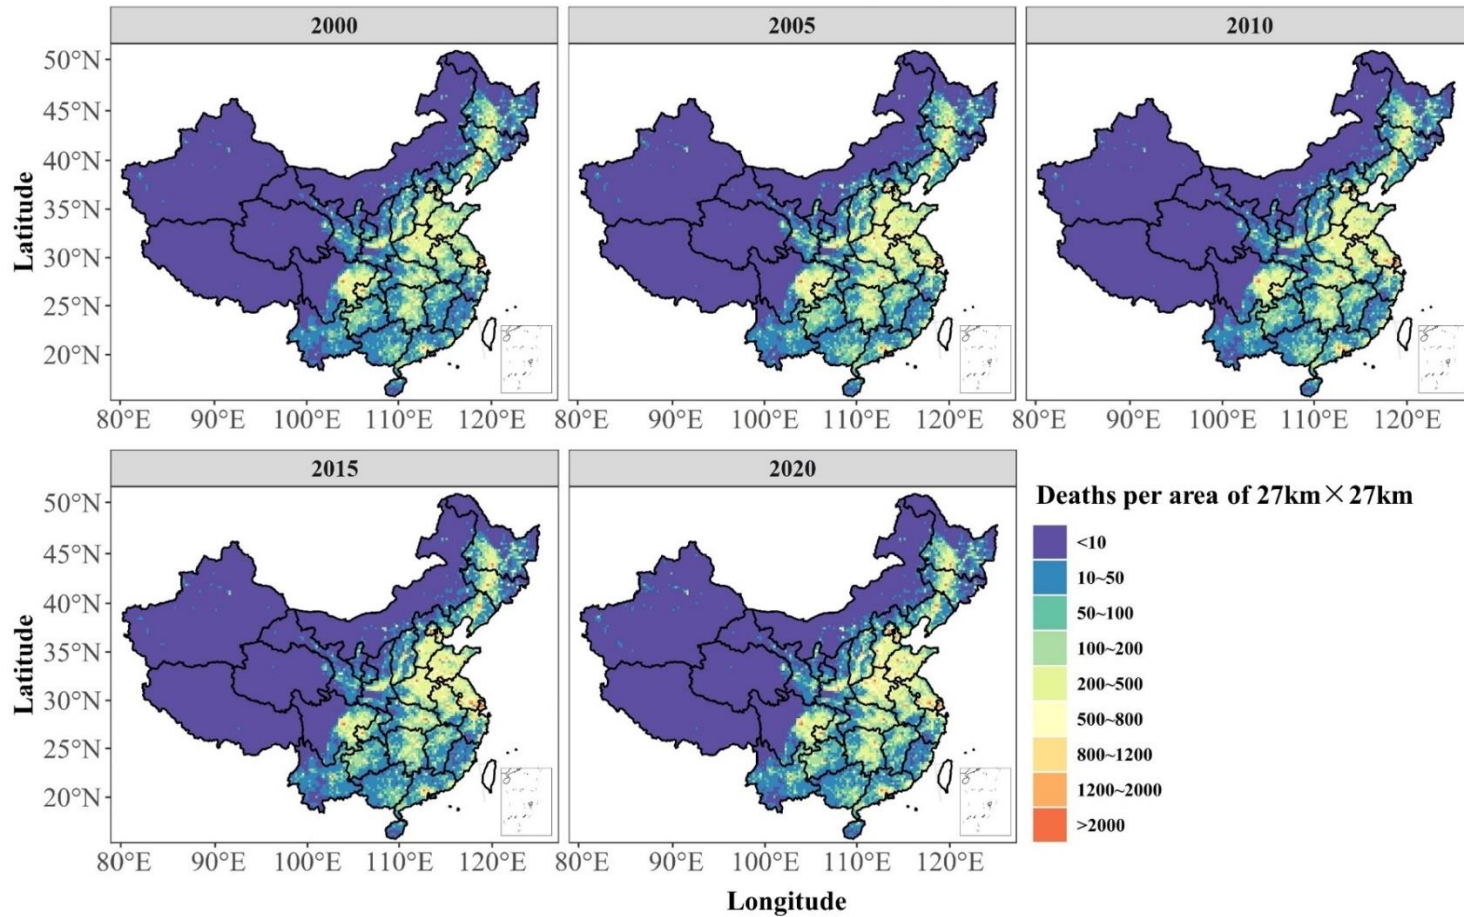

**Figure S9 Annual average contribution of interannual meteorological variation to changes of BC concentration (compared with the starting year of each subplot). Unit:  $\mu\text{g}/\text{m}^3$ .**

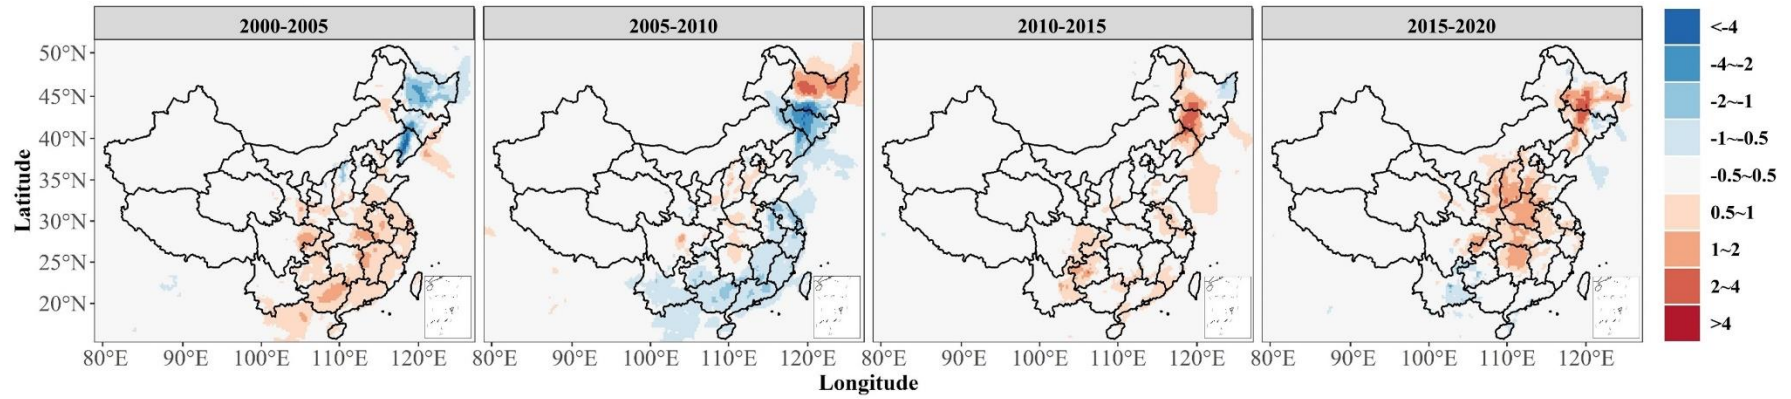

**Figure S10 Multiyear average fractions of BC AAOD to AAOD from MERRA-2.**

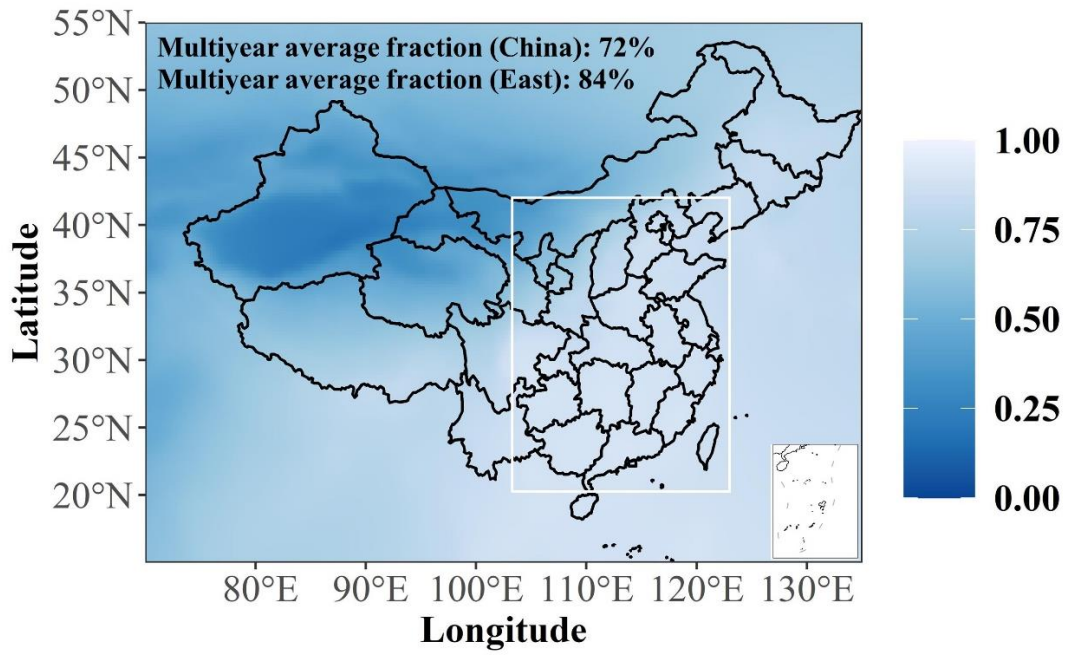

## References

- Bai, Z., Cui, X., Wang, X., Xie, H., and Chen, B.: Light absorption of black carbon is doubled at Mt. Tai and typical urban area in North China, *Sci. Total Environ.*, 635, 1144-1151, <https://doi.org/https://doi.org/10.1016/j.scitotenv.2018.04.244>, 2018.
- Bakatsoula, V. D., Korras-Carraca, M.-B., Hatzianastassiou, N., and Matsoukas, C.: A comparison of atmospheric aerosol absorption properties from the MERRA-2 reanalysis with AERONET, *Atmos. Environ.*, 311, 119997, <https://doi.org/https://doi.org/10.1016/j.atmosenv.2023.119997>, 2023.
- Binkowski, F. S. and Roselle, S. J.: Models-3 community multiscale air quality (CMAQ) model aerosol component - 1. Model description, *J. Geophys. Res.-Atmos.*, 108, <https://doi.org/10.1029/2001jd001409>, 2003.
- Bond, T. C., Doherty, S. J., Fahey, D. W., Forster, P. M., Berntsen, T., DeAngelo, B. J., Flanner, M. G., Ghan, S., Karcher, B., Koch, D., Kinne, S., Kondo, Y., Quinn, P. K., Sarofim, M. C., Schultz, M. G., Schulz, M., Venkataraman, C., Zhang, H., Zhang, S., Bellouin, N., Guttikunda, S. K., Hopke, P. K., Jacobson, M. Z., Kaiser, J. W., Klimont, Z., Lohmann, U., Schwarz, J. P., Shindell, D., Storelvmo, T., Warren, S. G., and Zender, C. S.: Bounding the role of black carbon in the climate system: A scientific assessment, *J. Geophys. Res.-Atmos.*, 118, 5380-5552, <https://doi.org/10.1002/jgrd.50171>, 2013.
- Buchard, V., Randles, C. A., da Silva, A. M., Darmenov, A., Colarco, P. R., Govindaraju, R., Ferrare, R., Hair, J., Beyersdorf, A. J., Ziemba, L. D., and Yu, H.: The MERRA-2 Aerosol Reanalysis, 1980 Onward. Part II: Evaluation and Case Studies, *J. Clim.*, 30, 6851-6872, <https://doi.org/10.1175/jcli-d-16-0613.1>, 2017.
- Cai, Z., Li, Z., Li, P., Li, J., Sun, H., Yang, Y., Gao, X., Ren, G., Ren, R., and Wei, J.: Vertical distributions of aerosol microphysical and optical properties based on aircraft measurements made over the Loess Plateau in China, *Atmos. Environ.*, 270, 118888, <https://doi.org/10.1016/j.atmosenv.2021.118888>, 2022.
- Cao, F., Zhang, X., Hao, C., Tiwari, S., and Chen, B.: Light absorption enhancement of particulate matters and their source apportionment over the Asian continental outflow site and South Yellow Sea, *Environ. Sci. Pollut. Res.*, 28, 8022-8035, <https://doi.org/10.1007/s11356-020-11134-y>, 2021.
- Chen, B., Bai, Z., Cui, X., Chen, J., Andersson, A., and Gustafsson, Ö.: Light absorption enhancement of black carbon from urban haze in Northern China winter, *Environ.*

- Pollut., 221, 418-426, <https://doi.org/https://doi.org/10.1016/j.envpol.2016.12.004>, 2017a.
- Chen, B., Zhu, Z. J., Wang, X. F., Andersson, A., Chen, J. M., Zhang, Q. Z., and Gustafsson, O.: Reconciling modeling with observations of radiative absorption of black carbon aerosols, *J. Geophys. Res.-Atmos.*, 122, 5932-5942, <https://doi.org/10.1002/2017jd026548>, 2017b.
- Chen, B., Du, K., Wang, Y., Chen, J., Zhao, J., Wang, K., Zhang, F., and Xu, L.: Emission and Transport of Carbonaceous Aerosols in Urbanized Coastal Areas in China, *Aerosol Air Qual. Res.*, 12, 371-378, <https://doi.org/10.4209/aaqr.2011.08.0131>, 2012.
- Chen, D., Zhao, Y., Lyu, R. T., Wu, R. R., Dai, L., Zhao, Y., Chen, F., Zhang, J., Yu, H., and Guan, M.: Seasonal and spatial variations of optical properties of light absorbing carbon and its influencing factors in a typical polluted city in Yangtze River Delta, China, *Atmos. Environ.*, 199, 45-54, <https://doi.org/10.1016/j.atmosenv.2018.11.022>, 2019a.
- Chen, P., Kang, S., Li, C., Zhang, Q., Guo, J., Tripathee, L., Zhang, Y., Li, G., Gul, C., Cong, Z., Wan, X., Niu, H., Panday, A. K., Rupakheti, M., and Ji, Z.: Carbonaceous aerosol characteristics on the Third Pole: A primary study based on the Atmospheric Pollution and Cryospheric Change (APCC) network, *Environ. Pollut.*, 253, 49-60, <https://doi.org/https://doi.org/10.1016/j.envpol.2019.06.112>, 2019b.
- Chen, W., Cao, X., Ran, H., Chen, T., Yang, B., and Zheng, X.: Concentration and source allocation of black carbon by AE-33 model in urban area of Shenzhen, southern China, *J. Environ. Health. Sci. Eng.*, 20, 469-483, <https://doi.org/10.1007/s40201-022-00793-3>, 2022.
- Chen, Y., Zhang, S., Peng, C., Shi, G., Tian, M., Huang, R. J., Guo, D., Wang, H., Yao, X., and Yang, F.: Impact of the COVID-19 pandemic and control measures on air quality and aerosol light absorption in Southwestern China, *Sci. Total Environ.*, 749, 141419, <https://doi.org/10.1016/j.scitotenv.2020.141419>, 2020.
- Chen, Y., Chen, R., Chen, Y., Dong, X., Zhu, J., Liu, C., van Donkelaar, A., Martin, R. V., Li, H., Kan, H., Jiang, Q., and Fu, C.: The prospective effects of long-term exposure to ambient PM<sub>2.5</sub> and constituents on mortality in rural East China, *Chemosphere*, 280, 130740, <https://doi.org/10.1016/j.chemosphere.2021.130740>,

2021.

- Cheng, H. R., Wang, Z. W., Feng, J. L., Chen, H. L., Zhang, F., and Liu, J.: Carbonaceous species composition and source apportionment of PM<sub>2.5</sub> in urban atmosphere of Wuhan, *Ecol. Evol. Sci.*, 21, 1574-1579 (in Chinese), 2012.
- Cheng, Y., He, K. B., Zheng, M., Duan, F. K., Du, Z. Y., Ma, Y. L., Tan, J. H., Yang, F. M., Liu, J. M., Zhang, X. L., Weber, R. J., Bergin, M. H., and Russell, A. G.: Mass absorption efficiency of elemental carbon and water-soluble organic carbon in Beijing, China, *Atmos. Chem. Phys.*, 11, 11497-11510, <https://doi.org/10.5194/acp-11-11497-2011>, 2011.
- Cui, F., Pei, S., Chen, M., and Ma, Y.: Seasonal variation and source analyses of aerosol optical properties in Nanjing, China, *Atmos. Pollut. Res.*, 12, 101117, <https://doi.org/https://doi.org/10.1016/j.apr.2021.101117>, 2021a.
- Cui, S., Xian, J., Shen, F., Zhang, L., Deng, B., Zhang, Y., and Ge, X.: One-Year Real-Time Measurement of Black Carbon in the Rural Area of Qingdao, Northeastern China: Seasonal Variations, Meteorological Effects, and the COVID-19 Case Analysis, *Atmosphere*, 12, 394, <https://doi.org/10.3390/atmos12030394>, 2021b.
- Cui, X., Wang, X., Yang, L., Chen, B., Chen, J., Andersson, A., and Gustafsson, Ö.: Radiative absorption enhancement from coatings on black carbon aerosols, *Sci. Total Environ.*, 551-552, 51-56, <https://doi.org/https://doi.org/10.1016/j.scitotenv.2016.02.026>, 2016.
- Ding, J., Huang, W., Zhao, J., Li, L., Xiong, G., Jiang, C., Ye, D., Li, D., Wang, J., Yu, J., and Liu, R.: Characteristics and source origins of carbonaceous aerosol in fine particulate matter in a megacity, Sichuan Basin, southwestern China, *Atmos. Pollut. Res.*, 13, 101266, <https://doi.org/10.1016/j.apr.2021.101266>, 2022.
- Ding, S., Liu, D. T., Hu, K., Zhao, D. L., Tian, P., Wang, F., Li, R. J., Chen, Y. C., He, H., Huang, M. Y., and Ding, D. P.: Optical and hygroscopic properties of black carbon influenced by particle microphysics at the top of the anthropogenically polluted boundary layer, *Atmos. Chem. Phys.*, 21, 681-694, <https://doi.org/10.5194/acp-21-681-2021>, 2021.
- Duan, F. K., He, K. B., Ma, Y. L., Yang, F. M., Yu, X. C., Cadle, S. H., Chan, T., and Mulawa, P. A.: Concentration and chemical characteristics of PM<sub>2.5</sub> in Beijing, China: 2001-2002, *Sci. Total Environ.*, 355, 264-275, <https://doi.org/10.1016/j.scitotenv.2005.03.001>, 2006.

- Duan, J., Tan, J., Cheng, D., Bi, X., Deng, W., Sheng, G., Fu, J., and Wong, M. H.: Sources and characteristics of carbonaceous aerosol in two largest cities in Pearl River Delta Region, China, *Atmos. Environ.*, 41, 2895-2903, <https://doi.org/10.1016/j.atmosenv.2006.12.017>, 2007.
- Emery, C., Tai, E., and Yarwood, G.: Enhanced meteorological modeling and performance evaluation for two Texas episodes, Report to the Texas Natural Resources Conservation Commission, the Texas Natural Resources Conservation Commission, ENVIRON, International Corp., Novato, CA, <https://www.tceq.texas.gov/assets/public/implementation/air/am/contracts/reports/mm/EnhancedMetModelingAndPerformanceEvaluation.pdf>, 2001.
- Feng, Y., Chen, Y., Guo, H., Zhi, G., Xiong, S., Li, J., Sheng, G., and Fu, J.: Characteristics of organic and elemental carbon in PM<sub>2.5</sub> samples in Shanghai, China, *Atmos. Res.*, 92, 434-442, <https://doi.org/10.1016/j.atmosres.2009.01.003>, 2009.
- Fu, X., Wang, X., Guo, H., Cheung, K. L., Ding, X., Zhao, X., He, Q., Gao, B., Zhang, Z., Liu, T., and Zhang, Y.: Trends of ambient fine particles and major chemical components in the Pearl River Delta region: Observation at a regional background site in fall and winter, *Sci. Total Environ.*, 497, 274-281, <https://doi.org/10.1016/j.scitotenv.2014.08.008>, 2014.
- Geng, G., Zheng, Y., Zhang, Q., Xue, T., Zhao, H., Tong, D., Zheng, B., Li, M., Liu, F., Hong, C., He, K., and Davis, S. J.: Drivers of PM<sub>2.5</sub> air pollution deaths in China 2002–2017, *Nat. Geosci.*, 14, 645–650, <https://doi.org/10.1038/s41561-021-00792-3>, 2021.
- Geng, G. N., Zhang, Q., Tong, D., Li, M., Zheng, Y. X., Wang, S. W., and He, K. B.: Chemical composition of ambient PM<sub>2.5</sub> over China and relationship to precursor emissions during 2005-2012, *Atmos. Chem. Phys.*, 17, 9187-9203, <https://doi.org/10.5194/acp-17-9187-2017>, 2017.
- Geng, N., Wang, J., Xu, Y., Zhang, W., Chen, C., and Zhang, R.: PM<sub>2.5</sub> in an industrial district of Zhengzhou, China: Chemical composition and source apportionment, *Particuology*, 11, 99-109, <https://doi.org/10.1016/j.partic.2012.08.004>, 2013.
- Gliß, J., Mortier, A., Schulz, M., Andrews, E., Balkanski, Y., Bauer, S. E., Benedictow, A. M. K., Bian, H., Checa-Garcia, R., Chin, M., Ginoux, P., Griesfeller, J. J., Heckel, A., Kipling, Z., Kirkevåg, A., Kokkola, H., Laj, P., Le Sager, P., Lund, M.



- T., Lund Myhre, C., Matsui, H., Myhre, G., Neubauer, D., van Noije, T., North, P., Oliv  , D. J. L., R  my, S., Sogacheva, L., Takemura, T., Tsigaridis, K., and Tsyro, S. G.: AeroCom phase III multi-model evaluation of the aerosol life cycle and optical properties using ground- and space-based remote sensing as well as surface in situ observations, *Atmos. Chem. Phys.*, 21, 87-128, <https://doi.org/10.5194/acp-21-87-2021>, 2021.
- Gu, J., Bai, Z., Liu, A., Wu, L., Xie, Y., Li, W., Dong, H., and Zhang, X.: Characterization of Atmospheric Organic Carbon and Element Carbon of PM<sub>2.5</sub> and PM<sub>10</sub> at Tianjin, China, *Aerosol Air Qual. Res.*, 10, 167-176, <https://doi.org/10.4209/aaqr.2009.12.0080>, 2010.
- Gu, J., Du, S., Han, D., Hou, L., Yi, J., Xu, J., Liu, G., Han, B., Yang, G., and Bai, Z.-P.: Major chemical compositions, possible sources, and mass closure analysis of PM<sub>2.5</sub> in Jinan, China, *Air Qual. Atmos. Health*, 7, 251-262, <https://doi.org/10.1007/s11869-013-0232-9>, 2014.
- He, K. B., Yang, F. M., Ma, Y. L., Zhang, Q., Yao, X. H., Chan, C. K., Cadle, S., Chan, T., and Mulawa, P.: The characteristics of PM<sub>2.5</sub> in Beijing, China, *Atmos. Environ.*, 35, 4959-4970, [https://doi.org/10.1016/s1352-2310\(01\)00301-6](https://doi.org/10.1016/s1352-2310(01)00301-6), 2001.
- Hu, Z. F., Kang, S. C., Li, C. L., Yan, F. P., Chen, P. F., Gao, S. P., Wang, Z. Y., Zhang, Y. L., and Sillanpaa, M.: Light absorption of biomass burning and vehicle emission-sourced carbonaceous aerosols of the Tibetan Plateau, *Environ. Sci. Pollut. Res.*, 24, 15369-15378, <https://doi.org/10.1007/s11356-017-9077-3>, 2017.
- Huang, X., Yun, H., Gong, Z., Li, X., He, L., Zhang, Y., and Hu, M.: Source apportionment and secondary organic aerosol estimation of PM<sub>2.5</sub> in an urban atmosphere in China, *Sci China Earth Sci*, 57, 1352-1362, <https://doi.org/10.1007/s11430-013-4686-2>, 2014.
- Janssen, N. A., Hoek, G., Simic-Lawson, M., Fischer, P., van Bree, L., ten Brink, H., Keuken, M., Atkinson, R. W., Anderson, H. R., Brunekreef, B., and Cassee, F. R.: Black carbon as an additional indicator of the adverse health effects of airborne particles compared with PM<sub>10</sub> and PM<sub>2.5</sub>, *Environ. Health Perspect.*, 119, 1691-1699, <https://doi.org/10.1289/ehp.1003369>, 2011.
- Ji, D. S., Li, L., Pang, B., Xue, P., Wang, L. L., Wu, Y. F., Zhang, H. L., and Wang, Y. S.: Characterization of black carbon in an urban-rural fringe area of Beijing, *Environ. Pollut.*, 223, 524-534, <https://doi.org/10.1016/j.envpol.2017.01.055>,

2017.

- Krewski, D., Jerrett, M., Burnett, R. T., Ma, R., Hughes, E., Shi, Y., Turner, M. C., Pope III, C. A., Thurston, G., and Calle, E. E.: Extended follow-up and spatial analysis of the American Cancer Society study linking particulate air pollution and mortality, Health Effects Institute Boston, MA, 2009.
- Lan, Z.-J., Huang, X.-F., Yu, K.-Y., Sun, T.-L., Zeng, L.-W., and Hu, M.: Light absorption of black carbon aerosol and its enhancement by mixing state in an urban atmosphere in South China, *Atmos. Environ.*, 69, 118-123, <https://doi.org/https://doi.org/10.1016/j.atmosenv.2012.12.009>, 2013.
- Li, B., Zhang, J., Zhao, Y., Yuan, S., Zhao, Q., Shen, G., and Wu, H.: Seasonal variation of urban carbonaceous aerosols in a typical city Nanjing in Yangtze River Delta, China, *Atmos. Environ.*, 106, 223-231, <https://doi.org/10.1016/j.atmosenv.2015.01.064>, 2015.
- Li, J. J., Wang, G. H., Wang, X. M., Cao, J. J., Sun, T., Cheng, C. L., Meng, J. J., Hu, T. F., and Liu, S. X.: Abundance, composition and source of atmospheric PM<sub>2.5</sub> at a remote site in the Tibetan Plateau, China, *Tellus B: Chem. Phys. Meteorol.*, 65, 20281, <https://doi.org/10.3402/tellusb.v65i0.20281>, 2013.
- Li, S., Zhu, M., Yang, W., Tang, M., Huang, X., Yu, Y., Fang, H., Yu, X., Yu, Q., Fu, X., Song, W., Zhang, Y., Bi, X., and Wang, X.: Filter-based measurement of light absorption by brown carbon in PM<sub>2.5</sub> in a megacity in South China, *Sci. Total Environ.*, 633, 1360-1369, <https://doi.org/https://doi.org/10.1016/j.scitotenv.2018.03.235>, 2018.
- Li, W., Bai, Z., Liu, A., Chen, J., and Chen, L.: Characteristics of Major PM<sub>2.5</sub> Components during Winter in Tianjin, China, *Aerosol Air Qual. Res.*, 9, 105-119, 2009.
- Li, Y., Du, A., Li, Z., Li, J., Chen, C., Sun, J., Qiu, Y., Zhang, Z., Wang, Q., Xu, W., Liu, X., Ji, D., Zhang, W., and Sun, Y.: Investigation of sources and formation mechanisms of fine particles and organic aerosols in cold season in Fenhe Plain, China, *Atmos. Res.*, 268, 106018, <https://doi.org/10.1016/j.atmosres.2022.106018>, 2022.
- Liang, F. C., Xiao, Q. Y., Huang, K. Y., Yang, X. L., Liu, F. C., Li, J. X., Lu, X. F., Liu, Y., and Gu, D. F.: The 17-y spatiotemporal trend of PM<sub>2.5</sub> and its mortality burden in China, *Proc. Natl. Acad. Sci. U.S.A.*, 117, 25601-25608,

- <https://doi.org/10.1073/pnas.1919641117>, 2020.
- Liu, B., Tan, X., Jin, Y., Yu, W., and Li, C.: Application of RR-XGBoost combined model in data calibration of micro air quality detector, *Sci. Rep.*, 11, 15662, <https://doi.org/10.1038/s41598-021-95027-1>, 2021.
- Liu, B., Li, T., Yang, J., Wu, J., Wang, J., Gao, J., Bi, X., Feng, Y., Zhang, Y., and Yang, H.: Source apportionment and a novel approach of estimating regional contributions to ambient PM<sub>2.5</sub> in Haikou, China, *Environ. Pollut.*, 223, 334-345, <https://doi.org/10.1016/j.envpol.2017.01.030>, 2017.
- Liu, D., Li, J., Zhang, Y., Xu, Y., Liu, X., Ding, P., Shen, C., Chen, Y., Tian, C., and Zhang, G.: The Use of Levoglucosan and Radiocarbon for Source Apportionment of PM<sub>2.5</sub> Carbonaceous Aerosols at a Background Site in East China, *Environ. Sci. Technol.*, 47, 10454-10461, <https://doi.org/10.1021/es401250k>, 2013.
- Liu, Y. J., Zhang, T. T., Liu, Q. Y., Zhang, R. J., Sun, Z. Q., and Zhang, M. G.: Seasonal Variation of Physical and Chemical Properties in TSP, PM<sub>10</sub> and PM<sub>2.5</sub> at a Roadside Site in Beijing and Their Influence on Atmospheric Visibility, *Aerosol Air Qual. Res.*, 14, 954-969, <https://doi.org/10.4209/aaqr.2013.01.0023>, 2014.
- Louie, P. K. K., Chow, J. C., Chen, L. W. A., Watson, J. G., Leung, G., and Sin, D. W. M.: PM<sub>2.5</sub> chemical composition in Hong Kong: Urban and regional variations, *Sci. Total Environ.*, 338, 267-281, <https://doi.org/10.1016/j.scitotenv.2004.07.021>, 2005a.
- Louie, P. K. K., Watson, J. G., Chow, J. C., Chen, A., Sin, D. W. M., and Lau, A. K. H.: Seasonal characteristics and regional transport of PM<sub>2.5</sub> in Hong Kong, *Atmos. Environ.*, 39, 1695-1710, <https://doi.org/10.1016/j.atmosenv.2004.11.017>, 2005b.
- Ma, Z. W., Dey, S., Christopher, S., Liu, R. Y., Bi, J., Balyan, P., and Liu, Y.: A review of statistical methods used for developing large-scale and long-term PM<sub>2.5</sub> models from satellite data, *Remote Sens. Environ.*, 269, 15, <https://doi.org/10.1016/j.rse.2021.112827>, 2022.
- Meng, Z., Yang, P., Kattawar, G. W., Bi, L., Liou, K. N., and Laszlo, I.: Single-scattering properties of tri-axial ellipsoidal mineral dust aerosols: A database for application to radiative transfer calculations, *J. Aerosol Sci.*, 41, 501-512, <https://doi.org/10.1016/j.jaerosci.2010.02.008>, 2010.
- Niu, H. W., Kang, S. C., Wang, H. L., Zhang, R. D., Lu, X. X., Qian, Y., Paudyal, R., Wang, S. J., Shi, X. F., and Yan, X. G.: Seasonal variation and light absorption

- property of carbonaceous aerosol in a typical glacier region of the southeastern Tibetan Plateau, *Atmos. Chem. Phys.*, 18, 6441-6460, <https://doi.org/10.5194/acp-18-6441-2018>, 2018.
- Pathak, R. K., Wang, T., Ho, K. F., and Lee, S. C.: Characteristics of summertime PM<sub>2.5</sub> organic and elemental carbon in four major Chinese cities: Implications of high acidity for water-soluble organic carbon (WSOC), *Atmos. Environ.*, 45, 318-325, <https://doi.org/10.1016/j.atmosenv.2010.10.021>, 2011.
- Pleim, J. and Ran, L.: Surface Flux Modeling for Air Quality Applications, *Atmosphere*, 2, 271-302, <https://doi.org/10.3390/atmos2030271>, 2011.
- Shen, G., Xue, M., Yuan, S., Zhang, J., Zhao, Q., Li, B., Wu, H., and Ding, A.: Chemical compositions and reconstructed light extinction coefficients of particulate matter in a mega-city. in the western Yangtze River Delta, China, *Atmos. Environ.*, 83, 14-20, <https://doi.org/10.1016/j.atmosenv.2013.10.055>, 2014.
- Song, Y., Xie, S., Zhang, Y., Zeng, L., Salmon, L. G., and Zheng, M.: Source apportionment of PM<sub>2.5</sub> in Beijing using principal component analysis/absolute principal component scores and UNMIX, *Sci. Total Environ.*, 372, 278-286, <https://doi.org/10.1016/j.scitotenv.2006.08.041>, 2006.
- Song, Y., Tang, X., Xie, S., Zhang, Y., Wei, Y., Zhang, M., Zeng, L., and Lu, S.: Source apportionment of PM<sub>2.5</sub> in Beijing in 2004, *J. Hazard. Mater.*, 146, 124-130, <https://doi.org/10.1016/j.jhazmat.2006.11.058>, 2007.
- Sun, J. Y., Wu, C., Wu, D., Cheng, C., Li, M., Li, L., Deng, T., Yu, J. Z., Li, Y. J., Zhou, Q., Liang, Y., Sun, T., Song, L., Cheng, P., Yang, W., Pei, C., Chen, Y., Cen, Y., Nian, H., and Zhou, Z.: Amplification of black carbon light absorption induced by atmospheric aging: temporal variation at seasonal and diel scales in urban Guangzhou, *Atmos. Chem. Phys.*, 20, 2445-2470, <https://doi.org/10.5194/acp-20-2445-2020>, 2020.
- Tan, Y., Wang, H., Zhu, B., Zhao, T., Shi, S., Liu, A., Liu, D., Pan, C., and Cao, L.: The interaction between black carbon and planetary boundary layer in the Yangtze River Delta from 2015 to 2020: Why O<sub>3</sub> didn't decline so significantly as PM<sub>2.5</sub>, *Environ. Res.*, 214, 114095, <https://doi.org/10.1016/j.envres.2022.114095>, 2022.
- Tang, X., Chen, X., and Tian, Y.: Chemical composition and source apportionment of PM<sub>2.5</sub> - A case study from one year continuous sampling in the Chang-Zhu-Tan urban agglomeration, *Atmos. Pollut. Res.*, 8, 885-899,

- <https://doi.org/10.1016/j.apr.2017.02.004>, 2017.
- Tao, J., Zhang, Z., Zhang, L., Wu, Y., Zhang, R., and Wang, B.: Impact of deliquescence of aerosol on mass absorption efficiency of elemental carbon in fine particles in urban Guangzhou in south China, *Atmos. Environ.*, 256, 118476, <https://doi.org/https://doi.org/10.1016/j.atmosenv.2021.118476>, 2021.
- Tao, J., Cheng, T., Zhang, R., Cao, J., Zhu, L., Wang, Q., Luo, L., and Zhang, L.: Chemical composition of PM<sub>2.5</sub> at an urban site of Chengdu in southwestern China, *Adv. Atmos. Sci.*, 30, 1070-1084, <https://doi.org/10.1007/s00376-012-2168-7>, 2013.
- Tao, J., Zhang, L., Cao, J., Hsu, S.-C., Xia, X., Zhang, Z., Lin, Z., Cheng, T., and Zhang, R.: Characterization and source apportionment of aerosol light extinction in Chengdu, southwest China, *Atmos. Environ.*, 95, 552-562, <https://doi.org/https://doi.org/10.1016/j.atmosenv.2014.07.017>, 2014a.
- Tao, J., Gao, J., Zhang, L., Zhang, R., Che, H., Zhang, Z., Lin, Z., Jing, J., Cao, J., and Hsu, S. C.: PM<sub>2.5</sub> pollution in a megacity of southwest China: source apportionment and implication, *Atmos. Chem. Phys.*, 14, 8679-8699, <https://doi.org/10.5194/acp-14-8679-2014>, 2014b.
- Tao, J., Zhang, L., Ho, K., Zhang, R., Lin, Z., Zhang, Z., Lin, M., Cao, J., Liu, S., and Wang, G.: Impact of PM<sub>2.5</sub> chemical compositions on aerosol light scattering in Guangzhou - the largest megacity in South China, *Atmos. Res.*, 135, 48-58, <https://doi.org/10.1016/j.atmosres.2013.08.015>, 2014c.
- Tao, J., Zhang, L., Cao, J., Zhong, L., Chen, D., Yang, Y., Chen, D., Chen, L., Zhang, Z., Wu, Y., Xia, Y., Ye, S., and Zhang, R.: Source apportionment of PM<sub>2.5</sub> at urban and suburban areas of the Pearl River Delta region, south China - With emphasis on ship emissions, *Sci. Total Environ.*, 574, 1559-1570, <https://doi.org/10.1016/j.scitotenv.2016.08.175>, 2017.
- Wang, P., Cao, J.-j., Shen, Z.-x., Han, Y.-m., Lee, S.-c., Huang, Y., Zhu, C.-s., Wang, Q.-y., Xu, H.-m., and Huang, R.-j.: Spatial and seasonal variations of PM<sub>2.5</sub> mass and species during 2010 in Xi'an, China, *Sci. Total Environ.*, 508, 477-487, <https://doi.org/10.1016/j.scitotenv.2014.11.007>, 2015.
- Wang, Q., Jiang, N., Yin, S., Li, X., Yu, F., Guo, Y., and Zhang, R.: Carbonaceous species in PM<sub>2.5</sub> and PM<sub>10</sub> in urban area of Zhengzhou in China: Seasonal variations and source apportionment, *Atmos. Res.*, 191, 1-11,

- <https://doi.org/10.1016/j.atmosres.2017.02.003>, 2017a.
- Wang, Q. L., Wang, L. L., Tao, M. H., Chen, N., Lei, Y. L., Sun, Y., Xin, J. Y., Li, T. T., Zhou, J. X., Liu, J. D., Ji, D. S., and Wang, Y. S.: Exploring the variation of black and brown carbon during COVID-19 lockdown in megacity Wuhan and its surrounding cities, China, *Sci. Total Environ.*, 791, 148226, <https://doi.org/10.1016/j.scitotenv.2021.148226>, 2021.
- Wang, Q. Y., Huang, R. J., Zhao, Z. Z., Cao, J. J., Ni, H. Y., Tie, X. X., Zhu, C. S., Shen, Z. X., Wang, M., Dai, W. T., Han, Y. M., Zhang, N. N., and Prevot, A. S. H.: Effects of photochemical oxidation on the mixing state and light absorption of black carbon in the urban atmosphere of China, *Environ. Res. Lett.*, 12, 044012, <https://doi.org/10.1088/1748-9326/aa64ea>, 2017b.
- Wei, X., Bi, X. H., Dong, H. Y., Chen, K., Sun, R., and Feng, Y. C.: Characteristics and Sources of Particulate Matter during Hazy and Non-Hazy Episodes in Tianjin City in Summer, *Research of Environmental Sciences*, 25, 1193-1200 (in Chinese), 2012.
- Wu, C., Wu, D., and Yu, J. Z.: Quantifying black carbon light absorption enhancement with a novel statistical approach, *Atmos. Chem. Phys.*, 18, 289-309, <https://doi.org/10.5194/acp-18-289-2018>, 2018a.
- Wu, D., Wu, C., Liao, B., Chen, H., Wu, M., Li, F., Tan, H., Deng, T., Li, H., Jiang, D., and Yu, J. Z.: Black carbon over the South China Sea and in various continental locations in South China, *Atmos. Chem. Phys.*, 13, 12257-12270, <https://doi.org/10.5194/acp-13-12257-2013>, 2013.
- Wu, X. Q., Liu, J., Wu, Y. F., Wang, X., Yu, X. W., Shi, J. S., Bi, J. R., Huang, Z. W., Zhou, T., and Zhang, R. J.: Aerosol optical absorption coefficients at a rural site in Northwest China: The great contribution of dust particles, *Atmos. Environ.*, 189, 145-152, <https://doi.org/10.1016/j.atmosenv.2018.07.002>, 2018b.
- Xia, Y., Wu, Y., Guo, Z., Zhang, J., Xiao, X., Song, L., and Zhang, R.: Observational study on aerosol adsorption at a rural site in Northern China, *China Powder Science and Technology*, 23, 17-23 (in Chinese), 2017.
- Xiao, Q. Y., Chang, H. H., Geng, G. N., and Liu, Y.: An Ensemble Machine-Learning Model To Predict Historical PM<sub>2.5</sub> Concentrations in China from Satellite Data, *Environ. Sci. Technol.*, 52, 13260-13269, <https://doi.org/10.1021/acs.est.8b02917>, 2018a.

- Xiao, S., Yu, X., Zhu, B., He, J., Lv, R., and Sha, D.: Source Apportionment of Black Carbon Aerosol in the North Suburban of Nanjing, *Environmental Science*, 39, 9-17 (in Chinese), 2018b.
- Xie, C. H., Xu, W. Q., Wang, J. F., Wang, Q. Q., Liu, D. T., Tang, G. Q., Chen, P., Du, W., Zhao, J., Zhang, Y. J., Zhou, W., Han, T. T., Bian, Q. Y., Li, J., Fu, P. Q., Wang, Z. F., Ge, X. L., Allan, J., Coe, H., and Sun, Y. L.: Vertical characterization of aerosol optical properties and brown carbon in winter in urban Beijing, China, *Atmos. Chem. Phys.*, 19, 165-179, <https://doi.org/10.5194/acp-19-165-2019>, 2019.
- Xie, F., Lin, Y. C., Ren, L., Gul, C., Wang, J. Q., Cao, F., Zhang, Y. X., Xie, T., Wu, J. Y., and Zhang, Y. L.: Decrease of atmospheric black carbon and CO<sub>2</sub> concentrations due to COVID-19 lockdown at the Mt. Waliguan WMO/GAW baseline station in China, *Environ. Res.*, 211, 112984, <https://doi.org/10.1016/j.envres.2022.112984>, 2022.
- Xing, Z. Y., Deng, J. J., Mu, C., Wang, Y., and Du, K.: Seasonal Variation of Mass Absorption Efficiency of Elemental Carbon in the Four Major Emission Areas in China, *Aerosol Air Qual. Res.*, 14, 1897-1905, <https://doi.org/10.4209/aaqr.2014.06.0121>, 2014.
- Xu, J., Jia, C., He, J., Xu, H., Tang, Y. T., Ji, D., Yu, H., Xiao, H., and Wang, C.: Biomass burning and fungal spores as sources of fine aerosols in Yangtze River Delta, China - Using multiple organic tracers to understand variability, correlations and origins, *Environ. Pollut.*, 251, 155-165, <https://doi.org/10.1016/j.envpol.2019.04.090>, 2019.
- Xu, X., Qin, N., Qi, L., Zou, B., Cao, S., Zhang, K., Yang, Z., Liu, Y., Zhang, Y., and Duan, X.: Development of season-dependent land use regression models to estimate BC and PM<sub>1</sub> exposure, *Sci. Total Environ.*, 793, 148540, <https://doi.org/10.1016/j.scitotenv.2021.148540>, 2021.
- Yang, F., He, K., Ye, B., Chen, X., Cha, L., Cadle, S. H., Chan, T., and Mulawa, P. A.: One-year record of organic and elemental carbon in fine particles in downtown Beijing and Shanghai, *Atmos. Chem. Phys.*, 5, 1449-1457, <https://doi.org/10.5194/acp-5-1449-2005>, 2005a.
- Yang, F., Tan, J., Zhao, Q., Du, Z., He, K., Ma, Y., Duan, F., Chen, G., and Zhao, Q.: Characteristics of PM<sub>2.5</sub> speciation in representative megacities and across China, *Atmos. Chem. Phys.*, 11, 5207-5219, <https://doi.org/10.5194/acp-11-5207-2011>,

2011.

- Yang, H., Yu, J. Z., Ho, S. S. H., Xu, J. H., Wu, W. S., Wan, C. H., Wang, X. D., Wang, X. R., and Wang, L. S.: The chemical composition of inorganic and carbonaceous materials in PM<sub>2.5</sub> in Nanjing, China, *Atmos. Environ.*, 39, 3735-3749, <https://doi.org/10.1016/j.atmosenv.2005.03.010>, 2005b.
- Yang, J., Zhao, Y., Cao, J., and Nielsen, C. P.: Co-benefits of carbon and pollution control policies on air quality and health till 2030 in China, *Environ. Int.*, 152, 106482, <https://doi.org/10.1016/j.envint.2021.106482>, 2021.
- Yang, L., Zhou, X., Wang, Z., Zhou, Y., Cheng, S., Xu, P., Gao, X., Nie, W., Wang, X., and Wang, W.: Airborne fine particulate pollution in Jinan, China: Concentrations, chemical compositions and influence on visibility impairment, *Atmos. Environ.*, 55, 506-514, <https://doi.org/10.1016/j.atmosenv.2012.02.029>, 2012.
- Yau, P. S., Lee, S. C., Cheng, Y., Huang, Y., Lai, S. C., and Xu, X. H.: Contribution of ship emissions to the fine particulate in the community near an international port in Hong Kong, *Atmos. Res.*, 124, 61-72, <https://doi.org/10.1016/j.atmosres.2012.12.009>, 2013.
- Ye, B. M., Ji, X. L., Yang, H. Z., Yao, X. H., Chan, C. K., Cadle, S. H., Chan, T., and Mulawa, P. A.: Concentration and chemical composition of PM<sub>2.5</sub> in Shanghai for a 1-year period, *Atmos. Environ.*, 37, 499-510, [https://doi.org/10.1016/s1352-2310\(02\)00918-4](https://doi.org/10.1016/s1352-2310(02)00918-4), 2003.
- Ye, Z., Liu, J., Gu, A., Feng, F., Liu, Y., Bi, C., Xu, J., Li, L., Chen, H., Chen, Y., Dai, L., Zhou, Q., and Ge, X.: Chemical characterization of fine particulate matter in Changzhou, China, and source apportionment with offline aerosol mass spectrometry, *Atmos. Chem. Phys.*, 17, 2573-2592, <https://doi.org/10.5194/acp-17-2573-2017>, 2017.
- Zhang, B. S. and Zhang, W. T.: Source apportionment of PM<sub>2.5</sub> in ambient air of Baotou, *Environmental Engineering*, 32, 71-74 (in Chinese), <https://doi.org/10.13205/j.hjgc.201404017>, 2014.
- Zhang, F., Zhao, J., Chen, J., Xu, Y., and Xu, L.: Pollution characteristics of organic and elemental carbon in PM<sub>2.5</sub> in Xiamen, China, *J. Environ. Sci.*, 23, 1342-1349, [https://doi.org/10.1016/s1001-0742\(10\)60559-1](https://doi.org/10.1016/s1001-0742(10)60559-1), 2011.
- Zhang, F., Xu, L., Chen, J., Yu, Y., Niu, Z., and Yin, L.: Chemical compositions and extinction coefficients of PM<sub>2.5</sub> in peri-urban of Xiamen, China, during June



- 2009-May 2010, Atmos. Res., 106, 150-158, <https://doi.org/10.1016/j.atmosres.2011.12.005>, 2012.
- Zhang, Q., Shen, Z. X., Lei, Y. L., Zhang, T., Zeng, Y. L., Ning, Z., Sun, J., Westerdahl, D., Xu, H. M., Wang, Q. Y., Cao, J. J., and Zhang, R. J.: Optical properties and source identification of black carbon and brown carbon: comparison of winter and summer haze episodes in Xi'an, Northwest China, Environ. Sci. Processes Impacts, 21, 2058-2069, <https://doi.org/10.1039/c9em00320g>, 2019.
- Zhang, R., Jing, J., Tao, J., Hsu, S. C., Wang, G., Cao, J., Lee, C. S. L., Zhu, L., Chen, Z., Zhao, Y., and Shen, Z.: Chemical characterization and source apportionment of PM<sub>2.5</sub> in Beijing: seasonal perspective, Atmos. Chem. Phys., 13, 7053-7074, <https://doi.org/10.5194/acp-13-7053-2013>, 2013.
- Zhang, X. Y., Wang, Y. Q., Zhang, X. C., Guo, W., and Gong, S. L.: Carbonaceous aerosol composition over various regions of China during 2006, J. Geophys. Res., 113, D14111, <https://doi.org/10.1029/2007jd009525>, 2008.
- Zhang, Y. and Kang, S.: Characteristics of carbonaceous aerosols analyzed using a multiwavelength thermal/optical carbon analyzer: A case study in Lanzhou City, Sci China Earth Sci, 62, 389-402, <https://doi.org/10.1007/s11430-017-9245-9>, 2019.
- Zhang, Y. T., Liu, H., Lei, S. D., Xu, W. Y., Tian, Y., Yao, W. J., Liu, X. Y., Liao, Q., Li, J., Chen, C., Sun, Y. L., Fu, P. Q., Xin, J. Y., Cao, J. J., Pan, X. L., and Wang, Z. F.: Mixing state of refractory black carbon in fog and haze at rural sites in winter on the North China Plain, Atmos. Chem. Phys., 21, 17631-17648, <https://doi.org/10.5194/acp-21-17631-2021>, 2021.
- Zhao, D., Huang, M., Tian, P., He, H., Lowe, D., Zhou, W., Sheng, J., Wang, F., Bi, K., Kong, S., Yang, Y., Liu, Q., Liu, D., and Ding, D.: Vertical characteristics of black carbon physical properties over Beijing region in warm and cold seasons, Atmos. Environ., 213, 296-310, <https://doi.org/https://doi.org/10.1016/j.atmosenv.2019.06.007>, 2019a.
- Zhao, M., Huang, Z., Qiao, T., Zhang, Y., Xiu, G., and Yu, J.: Chemical characterization, the transport pathways and potential sources of PM<sub>2.5</sub> in Shanghai: Seasonal variations, Atmos. Res., 158, 66-78, <https://doi.org/10.1016/j.atmosres.2015.02.003>, 2015a.
- Zhao, M., Qiao, T., Huang, Z., Zhu, M., Xu, W., Xiu, G., Tao, J., and Lee, S.:

- Comparison of ionic and carbonaceous compositions of PM<sub>2.5</sub> in 2009 and 2012 in Shanghai, China, *Sci. Total Environ.*, 536, 695-703, <https://doi.org/10.1016/j.scitotenv.2015.07.100>, 2015b.
- Zhao, P. S., Dong, F., He, D., Zhao, X. J., Zhang, X. L., Zhang, W. Z., Yao, Q., and Liu, H. Y.: Characteristics of concentrations and chemical compositions for PM<sub>2.5</sub> in the region of Beijing, Tianjin, and Hebei, China, *Atmos. Chem. Phys.*, 13, 4631-4644, <https://doi.org/10.5194/acp-13-4631-2013>, 2013.
- Zhao, Z., Cao, J., Chow, J. C., Watson, J. G., Chen, A. L. W., Wang, X., Wang, Q., Tian, J., Shen, Z., Zhu, C., Liu, S., Tao, J., Ye, Z., Zhang, T., Zhou, J., and Tian, R.: Multi-wavelength light absorption of black and brown carbon at a high-altitude site on the Southeastern margin of the Tibetan Plateau, China, *Atmos. Environ.*, 212, 54-64, <https://doi.org/https://doi.org/10.1016/j.atmosenv.2019.05.035>, 2019b.
- Zheng, C., Li, Z., Zhang, X., Jiang, H., and Zhou, X.: Seasonal Variation in Chemical Composition of Total Suspended Particles During the COVID-19 Pandemic in the Source Area of Urumqi River, Tianshan, China, *Front. Earth Sci.*, 10, 859203, <https://doi.org/10.3389/feart.2022.859203>, 2022.
